# Supplementary material for: Yolk–shell magnetic mesoporous TiO2 microspheres with flowerlike NiO nanosheets for highly selective enrichment of phosphopeptides
Source: Royal Society of Chemistry journal article supplement (doi:10.1039/c7nr05330d), 2017-01-01
Supplement: c7nr05330d1.pdf [file c7nr05330d1.pdf]

## Supporting information

### **Yolk-shell magnetic mesoporous TiO<sub>2</sub> microspheres with flowerlike NiO nanosheets for highly selective enrichment of phosphopeptides**

Yayun Hong,<sup>a</sup> Chenlu Pu,<sup>a</sup> Hongli Zhao,<sup>\*a</sup> Qianying Sheng,<sup>a</sup> Qiliang Zhan<sup>a</sup> and Minbo Lan<sup>\*a,b</sup>

*a. Shanghai Key Laboratory of Functional Materials Chemistry, School of Chemistry and Molecular Engineering, East China University of Science and Technology, Shanghai, People's Republic of China.*

*b. State Key Laboratory of Bioreactor Engineering, East China University of Science and Technology, Shanghai, 200237, People's Republic of China.*

*Corresponding authors. E-mail: honglizhao@ecust.edu.cn; (Dr. Hongli Zhao)*

*minbolan@ecust.edu.cn; (Prof. Dr. Minbo Lan) Tel: +86-21-64253574; Fax: +86-21-64252947*

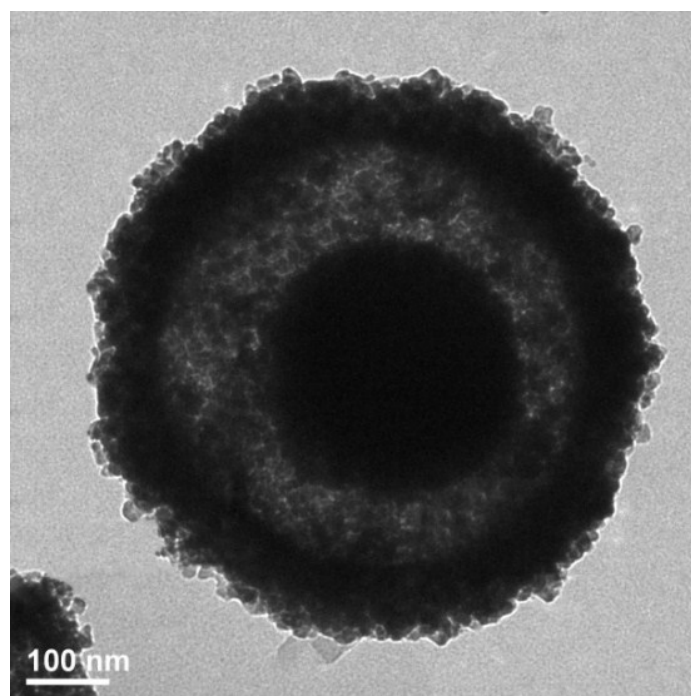

**Fig. S1** TEM image of Fe<sub>3</sub>O<sub>4</sub>@H-TiO<sub>2</sub> microspheres

**Table S1.** Detail information of the identified phosphopeptides enriched from the tryptic digests of  $\alpha$ -casein and non-fat milk by using  $\text{Fe}_3\text{O}_4@H\text{-TiO}_2$  or  $\text{Fe}_3\text{O}_4@H\text{-TiO}_2@f\text{-NiO}$  microspheres.

| NO.         | [M+H] <sup>+</sup> | peptide sequence                           | NO. of Phosphate groups | $\text{Fe}_3\text{O}_4@H\text{-TiO}_2$ |              | $\text{Fe}_3\text{O}_4@H\text{-TiO}_2@f\text{-NiO}$ |              |
|-------------|--------------------|--------------------------------------------|-------------------------|----------------------------------------|--------------|-----------------------------------------------------|--------------|
|             |                    |                                            |                         | $\alpha$ -Casein                       | Non-fat milk | $\alpha$ -Casein                                    | Non-fat milk |
| $\alpha$ 1  | 1026.42            | EKVNEL[pS]K                                | 1                       |                                        |              |                                                     | ✓            |
| $\alpha$ 2  | 1237.37            | TVDME[pS]TEVF                              | 1                       | ✓                                      |              | ✓                                                   | ✓            |
| $\alpha$ 3  | 1253.36            | TVD[Mo]E[pS]TEVF                           | 1                       | ✓                                      |              | ✓                                                   | ✓            |
| $\alpha$ 4  | 1411.39            | EQL[pS]T[pS]EENSK                          | 2                       |                                        | ✓            | ✓                                                   | ✓            |
| $\alpha$ 5  | 1459.52            | EQL[pS]TSEENSKK                            | 1                       |                                        |              | ✓                                                   |              |
| $\alpha$ 6  | 1466.51            | TVDME[pS]TEVFTK                            | 1                       | ✓                                      | ✓            | ✓                                                   | ✓            |
| $\alpha$ 7  | 1482.50            | TVD[Mo]E[pS]TEVFTK                         | 1                       |                                        | ✓            | ✓                                                   | ✓            |
| $\alpha$ 8  | 1539.47            | EQL[pS]T[pS]EENSKK                         | 2                       | ✓                                      |              | ✓                                                   | ✓            |
| $\alpha$ 9  | 1594.58            | TVDME[pS]TEVFTKK                           | 1                       |                                        |              | ✓                                                   |              |
| $\alpha$ 10 | 1660.67            | VPQLEIVPN[pS]AEER                          | 1                       | ✓                                      | ✓            | ✓                                                   | ✓            |
| $\alpha$ 11 | 1832.71            | YLGEYLIVPN[pS]AEER                         | 1                       | ✓                                      | ✓            | ✓                                                   | ✓            |
| $\alpha$ 12 | 1847.59            | DIGSE[pS]TEDQAMEDIK                        | 1                       |                                        | ✓            | ✓                                                   | ✓            |
| $\alpha$ 13 | 1927.55            | DIG[pS]E[pS]TEDQAMEDIK                     | 2                       | ✓                                      | ✓            | ✓                                                   | ✓            |
| $\alpha$ 14 | 1943.53            | DIG[pS]E[pS]TEDQA[Mo]EDIK                  | 2                       | ✓                                      | ✓            | ✓                                                   | ✓            |
| $\alpha$ 15 | 1951.81            | YKVPQLEIVPN[pS]AEER                        | 1                       | ✓                                      | ✓            | ✓                                                   | ✓            |
| $\alpha$ 16 | 1981.44            | NMAINP[pS]KENLCSTFCK                       | 1                       | ✓                                      |              | ✓                                                   | ✓            |
| $\alpha$ 17 | 2079.88            | KYKVPQLEIVPN[pS]AEER                       | 1                       |                                        |              | ✓                                                   |              |
| $\alpha$ 18 | 2618.69            | NTMEHV[pS] [pS] [pS]EE[pS]IISQETYK         | 4                       | ✓                                      |              | ✓                                                   | ✓            |
| $\alpha$ 19 | 2634.67            | NT[Mo]EHV[pS] [pS][pS]EE[pS]IISQETYK       | 4                       | ✓                                      |              | ✓                                                   | ✓            |
| $\alpha$ 20 | 2677.80            | VNEL[pS]KDIG[pS]E[pS]TEDQAMEDIK            | 3                       | ✓                                      |              | ✓                                                   |              |
| $\alpha$ 21 | 2703.70            | Q*MEAE[pS]I[pS][pS][pS]EEIVPN[pS]VEAQK     | 5                       | ✓                                      | ✓            | ✓                                                   | ✓            |
| $\alpha$ 22 | 2720.69            | QMEAE[pS]I[pS] [pS] [pS]EEIVPN[pS]VEAQK    | 5                       | ✓                                      | ✓            | ✓                                                   | ✓            |
| $\alpha$ 23 | 2736.66            | Q[Mo]EAE[pS]I[pS] [pS] [pS]EEIVPN[pS]VEAQK | 5                       | ✓                                      |              | ✓                                                   | ✓            |
| $\alpha$ 24 | 2746.77            | NTMEHV[pS] [pS] [pS]EE[pS]IISQETYKQ        | 4                       | ✓                                      | ✓            | ✓                                                   | ✓            |
| $\alpha$ 25 | 2934.93            | KEKVNEL[pS]KDIG[pS]E[pS]TEDQAMEDIKQ        | 3                       | ✓                                      |              | ✓                                                   | ✓            |
| $\alpha$ 26 | 2951.93            | KEKVNEL[pS]KDIG[pS]E[pS]TEDQA[Mo]EDIKQ     | 3                       |                                        |              | ✓                                                   |              |
| $\alpha$ 27 | 3007.80            | NANEEYSIG[pS][pS][pS]EE[pS]AEVATEEVK       | 4                       | ✓                                      | ✓            | ✓                                                   | ✓            |
| $\alpha$ 28 | 3087.75            | NANEEY[PS]IG[PS][PS][PS]EE[PS]AEVATEEVK    | 5                       | ✓                                      |              | ✓                                                   |              |
| $\beta$ 1   | 1031.33            | FQ[pS]EEQQQTEDELQDK                        | 1                       |                                        |              |                                                     | ✓            |
| $\beta$ 2   | 2061.61            | FQ[PS]EEQQQTEDELQDK                        | 1                       | ✓                                      | ✓            | ✓                                                   | ✓            |
| $\beta$ 3   | 2352.63            | NVPGEIVESL[pS][pS][pS]EE[pS]ITR            | 4                       |                                        | ✓            |                                                     | ✓            |
| $\beta$ 4   | 2431.87            | IEKFQ[pS]EEQQQTEDELQDK                     | 1                       |                                        |              |                                                     | ✓            |
| $\beta$ 5   | 2555.90            | FQ[pS]EEQQQTEDELQDKIHPF                    | 1                       | ✓                                      |              | ✓                                                   | ✓            |
| $\beta$ 6   | 2965.87            | ELEELNVPGEIVE[pS]L[pS][pS][pS]EESITR       | 4                       |                                        | ✓            |                                                     | ✓            |
| $\beta$ 7   | 3041.98            | RELEELNVPGEIVESL[pS][pS][pS]EESITR         | 3                       |                                        |              |                                                     | ✓            |
| $\beta$ 8   | 3122.02            | RELEELNVPGEIVE[PS]L[PS][PS][PS]EESITR      | 4                       | ✓                                      | ✓            | ✓                                                   | ✓            |

[pS]: Phosphorylated site; [Mo]: oxidation on methionine; \*: Pyroglutamylation on the N-terminal Q;

✓: Identified peptide.

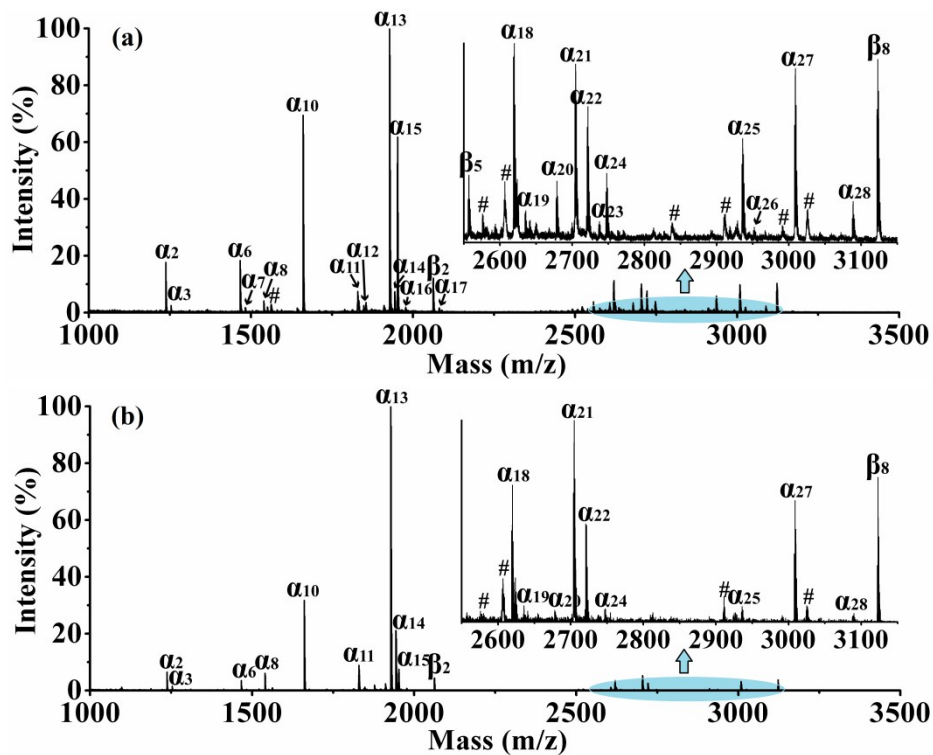

**Fig. S2** MALDI-TOF mass spectra of the tryptic digest of  $\alpha$ -casein ( $4 \times 10^{-7}$  M, 200  $\mu$ L) after rapid enrichment (Incubation time: 1 min; Elution time: 1 min). Enriched by (a)  $\text{Fe}_3\text{O}_4@H\text{-TiO}_2@f\text{-NiO}$  and (b)  $\text{Fe}_3\text{O}_4@H\text{-TiO}_2$  microspheres. # indicates dephosphorylated peptides.

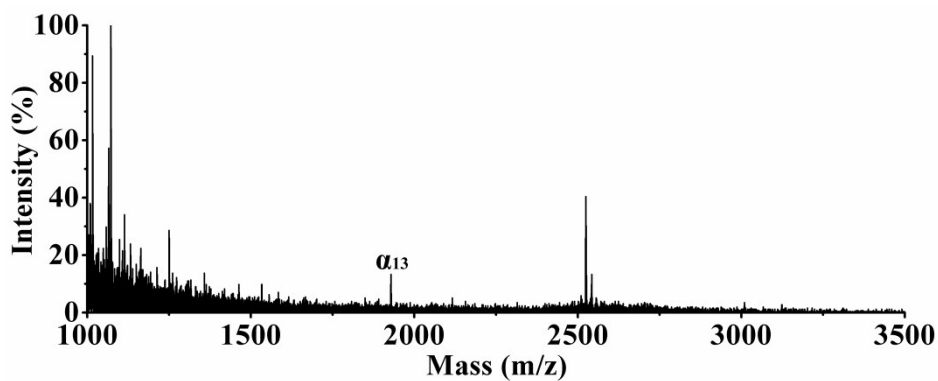

**Fig. S3** MALDI-TOF mass spectra of the tryptic digest mixtures of  $\alpha$ -casein and BSA after enrichment by  $\text{Fe}_3\text{O}_4@H\text{-TiO}_2$  microspheres at a molar ratio of 1:5000.

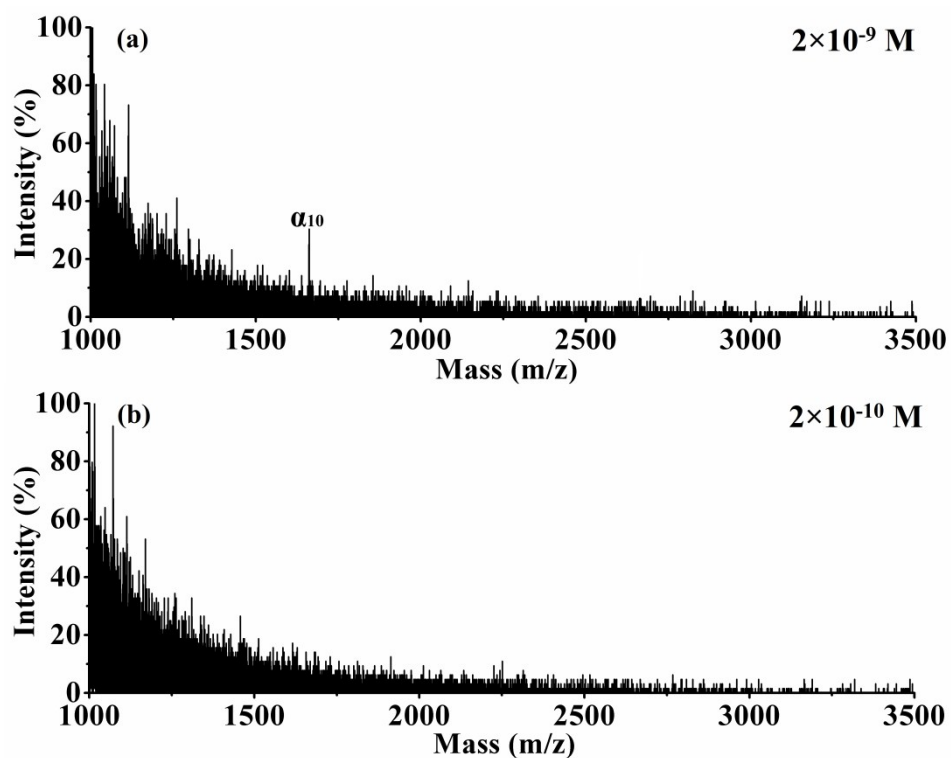

Fig. S4 MALDI-TOF mass spectra of phosphopeptides enriched from  $\alpha$ -casein tryptic digest with different concentrations using  $\text{Fe}_3\text{O}_4@H\text{-TiO}_2$  microspheres.

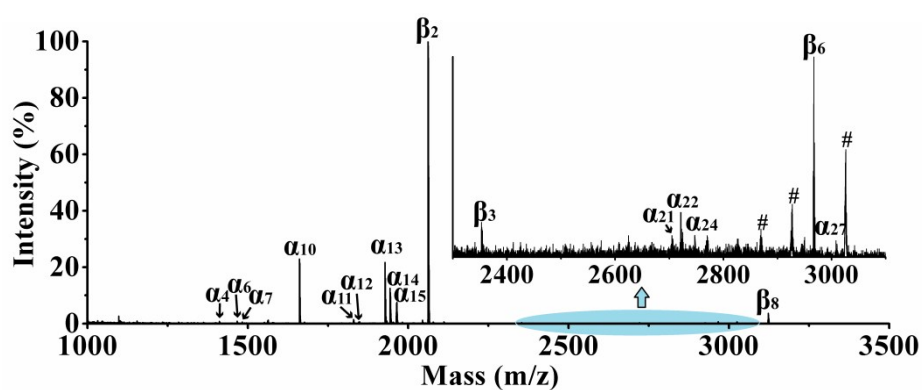

Fig. S5 MALDI-TOF mass spectra of the tryptic digest of non-fat milk after enrichment by  $\text{Fe}_3\text{O}_4@H\text{-TiO}_2$  microspheres. # indicates dephosphorylated peptides.

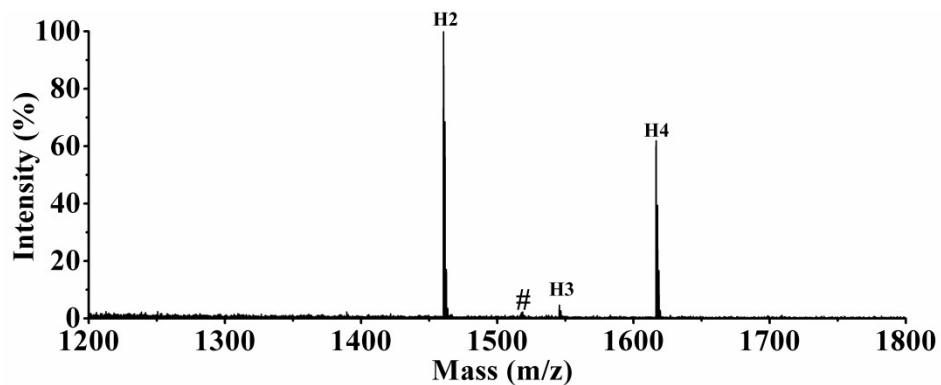

**Fig. S6** MALDI-TOF mass spectra of human serum after enrichment by  $\text{Fe}_3\text{O}_4@H\text{-TiO}_2$  microspheres. # indicates dephosphorylated peptides.

**Table S2.** Detail information of the endogenous phosphopeptides enriched from healthy human serum by using  $\text{Fe}_3\text{O}_4@H\text{-TiO}_2@f\text{-NiO}$  microspheres.

| NO. | observed m/z | peptide sequence    | NO. of Phosphate groups |
|-----|--------------|---------------------|-------------------------|
| H1  | 1389.4       | AD[pS]GEGDFLAEGGGV  | 1                       |
| H2  | 1460.5       | D[pS]GEGDFLAEGGGV   | 1                       |
| H3  | 1545.5       | D[pS]GEGDFLAEGGGVR  | 1                       |
| H4  | 1616.6       | AD[pS]GEGDFLAEGGGVR | 1                       |

[pS]: Phosphorylated site.

**Table S3.** Detail information of the phosphopeptides enriched from HeLa cell extracts by using Fe<sub>3</sub>O<sub>4</sub>@H-TiO<sub>2</sub>@f-NiO microspheres. Phosphorylation sites are indicated by s\*, t\* and y\* at serine, threonine and tyrosine respectively.

| No. | Protein | Peptide sequence                    | [M+H] <sup>+</sup> | RT[min] | IonScore |
|-----|---------|-------------------------------------|--------------------|---------|----------|
| 1   | A6NMY6  | LSLEGDHSTPPSAy*GSVK                 | 1924.87            | 35.72   | 67.85    |
| 2   | A8TX70  | GVQGSPPSRGs*R                       | 1254.56            | 42.91   | 24.51    |
| 3   | O00178  | LHGFDs*DCs*EDGEALNGEPELDLTSK        | 3052.19            | 59.21   | 25.79    |
| 4   | O00193  | SAs*PDDDLGSSNWEAADLGNEER            | 2514.99            | 55.31   | 112.22   |
|     |         | SAs*PDDDLGSSNWEAADLGNEERK           | 2643.08            | 47.93   | 37.71    |
| 5   | O00264  | EGEPTVYs*DEEEKDESAR                 | 2375.94            | 33.38   | 79.09    |
|     |         | GDQPAASGDs*DDDEPPPLPR               | 2115.85            | 40.66   | 137.18   |
|     |         | IVRGDQPAAs*GSDDEPPPLPR              | 2484.11            | 37.45   | 14.79    |
| 6   | O00267  | DVTNFTVGGFAPMs*PR                   | 1775.79            | 64.67   | 30.98    |
| 7   | O00425  | Gs*s*RQGSPGSVSK                     | 1393.55            | 19.22   | 33.37    |
| 8   | O00505  | NVPQEEsLEDs*DVDADFK                 | 2116.86            | 50.36   | 24.48    |
| 9   | O00567  | SFSKEELMs*SDLEETAGSTSIPK            | 2553.13            | 51.10   | 27.83    |
|     |         | SFs*KEELMSSDLEETAGSTSIPKR           | 2709.23            | 46.27   | 15.43    |
| 10  | O14545  | LDSQPQETs*PELPR                     | 1676.75            | 37.84   | 18.66    |
| 11  | O14737  | KVMDs*DEDDDY                        | 1411.46            | 35.03   | 48.32    |
|     |         | RKVMDs*DEDDDY                       | 1567.56            | 31.36   | 70.91    |
| 12  | O14745  | EALAEAALEs*PRPALVR                  | 1872.95            | 46.58   | 25.31    |
| 13  | O15164  | NEs*EDNKFSDDs*DDDFVQPR              | 2518.88            | 45.67   | 43.05    |
| 14  | O15173  | LLKPGEEPSEYt*DEEDTKDHNKQD           | 2897.24            | 30.70   | 35.33    |
| 15  | O15357  | TLSEVDy*APAGPAR                     | 1526.69            | 37.97   | 55.51    |
| 16  | O43159  | ALEAASLSQHPPSLcIs*Ds*EEEEEEER       | 3073.26            | 53.35   | 33.19    |
|     |         | ALEAASLSQHPPs*LcISDs*EEEEEEER       | 3073.24            | 53.27   | 20.56    |
| 17  | O43491  | VEGDNIy*VR                          | 1144.50            | 34.08   | 29.38    |
| 18  | O43719  | RSDs*VSASER                         | 1173.49            | 18.65   | 37.21    |
|     |         | SDs*VSASER                          | 1017.39            | 20.19   | 48.62    |
|     |         | VFDDEs*DEKEDEEYADEK                 | 2271.84            | 37.28   | 28.00    |
|     |         | VLDEEGs*EREFDDEs*DEKEEEEDTYEK       | 3440.26            | 42.40   | 18.82    |
| 19  | O43765  | SRTPs*ASNDDQQE                      | 1514.57            | 20.57   | 60.75    |
| 20  | O43823  | VDs*EGDFs*ENDDAAGDFR                | 2105.70            | 55.43   | 38.87    |
| 21  | O43896  | LYADs*Ds*GDDSDKR                    | 1703.58            | 26.33   | 37.90    |
| 22  | O60231  | LLEDs*EEs*SEETVSR                   | 1869.70            | 43.61   | 121.43   |
| 23  | O60271  | SAs*Qs*SLDKLDQELK                   | 1808.78            | 48.63   | 35.44    |
| 24  | O60341  | EMDESLANLs*EDEYYs*EEER              | 2597.91            | 62.18   | 39.65    |
| 25  | O60343  | LGs*VDSFER                          | 1089.46            | 42.09   | 41.34    |
|     |         | Ts*s*TeSNESLSVGGTSVTPR              | 2186.87            | 46.88   | 78.68    |
| 26  | O60504  | LcDDGPQLPTs*PR                      | 1535.66            | 40.64   | 34.40    |
| 27  | O60678  | GAVENEEDLPELs*Ds*GDEAAWEDEDDADLPHGK | 3714.42            | 61.28   | 71.08    |
| 28  | O60716  | SLDNNy*STPNER                       | 1489.59            | 26.67   | 64.02    |
| 29  | O60832  | AGLESGAEPGDGSDt*TK                  | 1786.70            | 30.56   | 29.73    |

|    |        |                                    |         |       |        |
|----|--------|------------------------------------|---------|-------|--------|
|    |        | AGLESGAEPGDGDs*DTTK                | 1786.70 | 30.88 | 32.75  |
|    |        | KREs*Es*Es*DETPPAAPQLIK            | 2451.99 | 43.44 | 32.75  |
|    |        | KREs*Es*Es*ESDETPPAAPQLIK          | 2372.05 | 39.41 | 31.58  |
| 30 | O60841 | NKPGPNIEs*GNEDDDASFK               | 2113.87 | 34.17 | 112.95 |
|    |        | Qs*FDDNDSEELEDKDSK                 | 2080.78 | 32.73 | 35.54  |
|    |        | SRINs*s*GEs*GDEs*DEFLQSR           | 2519.83 | 62.69 | 22.30  |
|    |        | VEMYS*s*Gs*DDDDDFNKLPK             | 2234.82 | 52.00 | 51.14  |
|    |        | VEmy*s*GSDDDDDFNKLPK               | 2250.82 | 46.87 | 11.60  |
| 31 | O75116 | SQLQALHIGLDS*s*IGSGPGDAEADDGFPESR  | 3373.42 | 64.71 | 53.18  |
|    |        | SQLQALHIGLDS*SSIGs*GPGDAEADDGFPESR | 3373.42 | 65.69 | 38.48  |
| 32 | O75400 | HKs*Ds*PEs*DAERЕК                  | 1854.64 | 21.00 | 26.30  |
| 33 | O75475 | TGVt*STs*DSEEEGDDQEGEK             | 2259.77 | 30.76 | 35.32  |
|    |        | TGVt*STSDs*EEEGDDQEGEK             | 2259.77 | 30.66 | 55.14  |
|    |        | TGVTs*TSDs*EEEGDDQEGEK             | 2259.77 | 30.47 | 42.58  |
|    |        | TGVt*STSDs*EEEGDDQEGEKK            | 2387.86 | 24.75 | 30.99  |
|    |        | TGVt*STs*DSEEEGDDQEGEKK            | 2387.86 | 24.92 | 35.00  |
|    |        | TGVt*STSDs*EEEGDDQEGEKKR           | 2543.97 | 22.28 | 84.39  |
|    |        | TGVTSTs*Ds*EEEGDDQEGEKKR           | 2543.96 | 22.49 | 80.16  |
| 34 | O75643 | EEAs*DDDMEGDEAVVR                  | 1846.67 | 39.72 | 120.97 |
|    |        | EEAs*DDDmEGDEAVVR                  | 1862.67 | 32.90 | 41.34  |
| 35 | O75821 | GIPLATGDTs*PEPELLPGAPLPPPK         | 2544.30 | 63.91 | 15.13  |
|    |        | GIPLAt*GDTsPEPELLPGAPLPPPK         | 2544.29 | 63.29 | 25.57  |
| 36 | O75822 | AAAAAAAGDs*Ds*WDADAFSVEDPVR        | 2625.01 | 76.39 | 43.33  |
| 37 | O75909 | KPs*PQPs*SPR                       | 1240.51 | 18.96 | 41.38  |
|    |        | KPs*PQPs*s*PR                      | 1240.51 | 18.91 | 38.21  |
| 38 | O76021 | At*NESEDEIPQLVPIGK                 | 1919.90 | 57.79 | 39.94  |
| 39 | O94826 | As*PAPGSGHPEGPGAHLDMNSLDR          | 2450.05 | 38.78 | 22.84  |
| 40 | O94875 | SFTSSSPS*s*PSR                     | 1306.53 | 26.52 | 54.25  |
|    |        | SFTSSSPs*s*PSR                     | 1386.50 | 30.83 | 46.88  |
| 41 | O94913 | s*RSPIHs*PK                        | 1281.58 | 23.05 | 36.54  |
| 42 | O95218 | ENVEYIEREEs*DGEYDEFGR              | 2545.00 | 48.67 | 42.39  |
|    |        | EVEDKEs*EGEEDEDEDLSK               | 2419.90 | 30.40 | 16.67  |
| 43 | O95361 | Et*EEQSDSAEQGDPAGEGK               | 2158.79 | 24.86 | 48.20  |
| 44 | O95425 | DSSFTEVPRs*PK                      | 1429.64 | 32.77 | 27.70  |
| 45 | O95671 | HDSIPAADt*FEDLSDVEGGGSEPTQR        | 2810.18 | 53.22 | 27.48  |
| 46 | O95817 | VPPAPVPcPPPSPGs*AVPSs*PK           | 2379.09 | 48.19 | 24.78  |
| 47 | P00533 | ELVEPLt*PSGEAPNQALLR               | 2114.05 | 55.91 | 29.67  |
| 48 | P00558 | ALEs*PERPFLAILGGAK                 | 1848.96 | 64.33 | 14.91  |
| 49 | P01111 | QVVIDGETcLLDILDITAGQEEy*SAMR       | 3006.35 | 82.50 | 60.20  |
| 50 | P02545 | ASSHs*s*QTQGGGSVTK                 | 1678.65 | 18.97 | 86.87  |
|    |        | ASs*HSSQTQGGGSVTK                  | 1598.68 | 17.93 | 91.80  |
|    |        | ASs*Hs*SQTQGGGSVTKK                | 1806.74 | 17.87 | 34.42  |
|    |        | GRASs*Hs*SQTQGGGSVTK               | 1891.77 | 18.18 | 27.56  |
|    |        | KLESTEs*R                          | 1029.46 | 18.26 | 35.07  |

|    |        |                                        |         |       |        |
|----|--------|----------------------------------------|---------|-------|--------|
|    |        | LRLs*PSPTSQR                           | 1321.66 | 29.87 | 42.50  |
|    |        | LRLs*Ps*PTSQR                          | 1401.63 | 33.99 | 37.87  |
|    |        | LSPs*PTSQR                             | 1052.48 | 22.38 | 52.76  |
|    |        | SGAQASSt*PLs*PTR                       | 1519.62 | 30.39 | 58.64  |
|    |        | SGAQASSTPLs*PTR                        | 1439.65 | 28.65 | 76.87  |
|    |        | s*VGGSGGGSFGDNLVTR                     | 1646.72 | 45.47 | 42.36  |
| 51 | P02786 | SAFSNLFGEPLSy*TR                       | 1825.82 | 67.17 | 41.52  |
| 52 | P04004 | Ds*WEDIFELLFWGR                        | 1892.83 | 86.22 | 54.92  |
| 53 | P04792 | ALs*RQLs*SGVSEIR                       | 1662.76 | 43.10 | 33.44  |
|    |        | GPs*WDPFR                              | 1041.42 | 59.67 | 32.75  |
|    |        | GPs*WDPFRDWYPHSR                       | 1982.83 | 62.02 | 28.30  |
|    |        | QLs*SGVSEIR                            | 1155.54 | 36.20 | 63.94  |
| 54 | P05386 | KEEs*EEs*DDDMGFGLFD                    | 2109.69 | 83.08 | 82.75  |
|    |        | KEESEEs*DDDMGFGLFD                     | 2029.73 | 70.87 | 56.52  |
|    |        | KEEs*EEs*DDDmGFGLFD                    | 2125.69 | 75.85 | 75.68  |
| 55 | P05387 | KEEs*EEs*DDDmGFGLFD                    | 2125.69 | 75.85 | 75.68  |
|    |        | KEESEEs*DDDmGFGLFD                     | 2045.72 | 62.82 | 16.05  |
|    |        | KEEs*EEs*DDDMGFGLFD                    | 2109.69 | 83.08 | 82.75  |
|    |        | KEESEEs*DDDMGFGLFD                     | 2029.73 | 70.87 | 56.52  |
| 56 | P05388 | VEAKEEs*EEs*DEDMGFGLFD                 | 2422.86 | 81.81 | 45.09  |
| 57 | P05455 | FAs*DDEHDEHDENGATGPVKR                 | 2405.96 | 25.45 | 41.00  |
|    |        | TKFAs*DDEHDEHDENGATGPVKR               | 2635.09 | 27.38 | 13.33  |
| 58 | P05556 | WDTGENPIy*K                            | 1302.54 | 42.37 | 39.66  |
| 59 | P05787 | s*YTSGPGR                              | 991.39  | 21.88 | 38.23  |
|    |        | SYt*SGPGR                              | 991.39  | 22.33 | 37.62  |
| 60 | P06239 | LIEDNEy*TAR                            | 1303.55 | 29.78 | 43.19  |
| 61 | P06493 | IGEGTy*GVVYK                           | 1265.58 | 38.64 | 36.73  |
| 62 | P06748 | cGSGPvHISGQHLVAVEEDAEs*EDEEEEDVK       | 3460.44 | 45.13 | 99.85  |
| 63 | P07355 | LSLEGDHSTPPSAy*GSVK                    | 1924.87 | 36.05 | 84.01  |
| 64 | P07814 | EYIPGQPPLSQSSDs*SPTR                   | 2125.95 | 44.82 | 36.76  |
|    |        | EYIPGQPPLSQSs*DSSPTR                   | 2125.95 | 44.65 | 38.13  |
|    |        | EYIPGQPPLSQs*SDSSPTRNSEPAGLETPEAK      | 3449.57 | 46.49 | 12.28  |
| 65 | P07900 | ESEDKPEIEDVGs*DEEEKK                   | 2400.98 | 30.92 | 51.15  |
|    |        | Es*EDKPEIEDVGSDEEEKKDGDK               | 2816.15 | 29.64 | 36.53  |
| 66 | P07910 | MESEGGADDs*AEEDLLDDDDNEDR              | 2778.97 | 49.08 | 27.73  |
|    |        | MEs*EGGADDSAEEDLLDDDDNEDR              | 2778.98 | 49.15 | 49.78  |
|    |        | MESEGGADDs*AEEDLLDDDDNEDRGDDQLELIKDDEK | 4277.68 | 53.68 | 29.64  |
|    |        | NDKs*EEEQSSSVK                         | 1633.66 | 18.60 | 93.91  |
| 67 | P08238 | IEDVGs*DEEDDSGK                        | 1574.58 | 28.79 | 71.60  |
|    |        | IEDVGs*DEEDDSGKDK                      | 1817.69 | 25.17 | 116.21 |
|    |        | IEDVGs*DEEDDSGKDKK                     | 1945.79 | 22.39 | 107.27 |
| 68 | P08240 | GTGs*GGQLQDLDes*s*SDDEGAAQNSTKPSATK    | 3409.28 | 42.41 | 27.39  |
| 69 | P09601 | DQs*PSRAPGLR                           | 1263.58 | 24.87 | 20.07  |
| 70 | P09651 | SEs*PKEPEQLR                           | 1379.62 | 27.06 | 45.59  |



|    |        |                                              |         |       |        |
|----|--------|----------------------------------------------|---------|-------|--------|
| 71 | P0DJ93 | ELVGD TGSQEGDHEPs*Gs*ETEEDTSSSPHR            | 3316.24 | 31.69 | 34.78  |
| 72 | P10398 | SAs*EPSLHR                                   | 1063.46 | 21.94 | 63.13  |
| 73 | P10644 | TDSREDEIs*PPPPNPVVK                          | 2056.96 | 36.86 | 42.11  |
| 74 | P10809 | TVIIQSWGs*PK                                 | 1424.68 | 48.34 | 29.71  |
| 75 | P11388 | IKNENTEGs*PQEDGVELEGLK                       | 2366.07 | 41.69 | 19.76  |
| 76 | P11717 | ALs*s*LHGDDQDSEDEVLTIPEVK                    | 2657.13 | 60.13 | 19.52  |
|    |        | ALSSLHGDDQDs*EDEVLTIPVVK                     | 2577.16 | 53.59 | 40.15  |
|    |        | LVSFHDDs*DEDLLHI                             | 1834.79 | 59.73 | 10.66  |
| 77 | P12270 | TDGFAEAIHs*PQVAGVPR                          | 1931.90 | 46.54 | 20.65  |
| 78 | P13051 | KAPAGQEEPPTPs*s*PLSAEQQLDR                   | 2622.14 | 43.54 | 20.47  |
| 79 | P13639 | AGETRFt*DTR                                  | 1233.52 | 23.99 | 29.40  |
|    |        | Ft*DtRKDEQER                                 | 1584.61 | 20.40 | 20.88  |
| 80 | P13861 | RVs*VcAETYNPDEEEEDTDPR                       | 2591.03 | 38.60 | 38.24  |
|    |        | VADAKGDs*Es*EEDEDLEVPVPSR                    | 2633.06 | 48.16 | 90.76  |
| 81 | P15151 | ENs*SSQDPQTEGTR                              | 1615.63 | 20.66 | 28.03  |
|    |        | ENSs*SQDPQTEGTR                              | 1615.62 | 20.78 | 24.48  |
| 82 | P15408 | s*PPAPGLQPMR                                 | 1230.57 | 38.26 | 27.39  |
| 83 | P16949 | ASGQAFELILs*PR                               | 1468.72 | 60.67 | 91.21  |
|    |        | As*GQAFELILs*PR                              | 1548.68 | 70.73 | 64.96  |
|    |        | ESVPEFPLs*PPK                                | 1406.66 | 55.20 | 36.08  |
|    |        | ESVPEFPLs*PPKKK                              | 1662.86 | 39.57 | 16.96  |
|    |        | RAs*GQAFELILs*PR                             | 1704.79 | 60.11 | 78.16  |
|    |        | SKESVPEFPLs*PPK                              | 1621.79 | 47.46 | 42.99  |
| 84 | P17096 | KLEKEEEEGIs*QEs*s*EEEQ                       | 2476.89 | 36.53 | 90.11  |
|    |        | KLEKEEEEGISQEs*s*EEEQ                        | 2396.93 | 33.24 | 72.06  |
|    |        | KQPPVs*PGTALVGSQKEPSEVPt*PK                  | 2718.31 | 39.70 | 16.40  |
| 85 | P17544 | TDSVIIADQt*Pt*PTR                            | 1774.77 | 45.98 | 26.60  |
| 86 | P17812 | SGSs*SPDSEITELKFPSINHD                       | 2327.01 | 56.62 | 22.38  |
|    |        | SGs*SSPDSEITELKFPSINHD                       | 2327.01 | 56.39 | 28.61  |
| 87 | P18054 | Rs*Ts*LPSR                                   | 1063.43 | 19.23 | 32.42  |
| 88 | P18583 | DTEEPLPVKESDQTLAALLs*PK                      | 2461.22 | 66.55 | 24.19  |
|    |        | ESDQTLAALLs*PK                               | 1452.69 | 60.36 | 56.22  |
|    |        | RRs*Fs*Is*PVR                                | 1444.59 | 38.33 | 32.81  |
|    |        | s*Fs*Is*PSRR                                 | 1276.45 | 42.56 | 30.17  |
| 89 | P18615 | SIs*ADDDLQESSR                               | 1133.47 | 18.20 | 56.31  |
|    |        | SGAHSSAs*PPR                                 | 1502.60 | 34.87 | 69.54  |
| 90 | P18858 | TIQEVLEEQs*EDEDREAK                          | 2227.96 | 41.34 | 13.23  |
|    |        | VLGs*EGEEDEALs*PAK                           | 1919.76 | 47.03 | 63.88  |
|    |        | VLGs*EGEEDEALSPAK                            | 1839.79 | 43.36 | 18.26  |
| 91 | P19105 | ATs*NVFAMFDQSQIQEFK                          | 2170.95 | 72.96 | 60.88  |
| 92 | P19338 | AAAAAPAs*EDEDDEDDEDDEDDEDDEDDEDs*EEEAMETTPAK | 4606.50 | 49.75 | 72.17  |
|    |        | KEDs*DEEEDDDs*EEDEEDDEDEDEDEDEIEPAAMK        | 4279.38 | 51.04 | 115.36 |
|    |        | KEDs*DEEEDDDs*EEDEEDDEDEDEDEDEIEPAAMk        | 4295.36 | 43.41 | 60.28  |
|    |        | KVVVs*PTK                                    | 937.51  | 20.59 | 65.55  |

|     |        |                                          |         |       |        |
|-----|--------|------------------------------------------|---------|-------|--------|
|     |        | KVVVs*PTKK                               | 1065.61 | 19.95 | 64.16  |
|     |        | LELQGPRGs*PNAR                           | 1474.71 | 30.65 | 29.32  |
|     |        | mAPPPKEVEEDs*EDEEMs*EDEEDDs*s*GEEVVIPQKK | 4398.60 | 49.34 | 24.26  |
|     |        | MAPPPKEVEEDs*EDEEMsvEDEEDDs*s*GEEVVIPQKK | 4302.64 | 47.31 | 21.36  |
|     |        | MAPPPKEVEEDs*EDEEMs*EDEEDDs*SGEEVVIPQKK  | 4302.62 | 47.64 | 21.99  |
|     |        | MAPPPKEVEEDs*EDEEMSEDEEDDs*s*GEEVVIPQKK  | 4382.59 | 51.90 | 23.07  |
|     |        | VVVVs*PTKK                               | 937.51  | 19.29 | 33.01  |
| 93  | P20020 | IEDs*EPHIPLIDDTDAEDDAPTKR                | 2772.22 | 48.80 | 20.09  |
| 94  | P20700 | AGGPTt*PLs*PTR                           | 1314.55 | 34.17 | 34.98  |
|     |        | LKLs*Ps*PSSR                             | 1231.55 | 31.84 | 46.75  |
|     |        | LKLs*PSPSSR                              | 1151.58 | 28.64 | 40.11  |
|     |        | LSPs*PSSR                                | 910.40  | 21.58 | 39.71  |
|     |        | VTVSRAAs*SSR                             | 1129.54 | 18.49 | 21.68  |
| 95  | P20810 | EGITGPPADSSKPIGPDDAIDALSSDFTcGs*PTAAGK   | 3682.65 | 63.91 | 28.87  |
|     |        | KEGITGPPADSSKPIGPDDAIDALSSDFTcGs*PTAAGK  | 3810.74 | 57.29 | 33.14  |
| 96  | P21291 | GFGFGQGAGALVHs*E                         | 1513.65 | 54.58 | 38.02  |
| 97  | P21333 | AFGPGLQGSAGs*PAR                         | 1509.68 | 38.23 | 104.11 |
|     |        | cSGPGLs*PGMVR                            | 1297.54 | 41.24 | 84.74  |
| 98  | P21796 | LTFDSSFs*PNTGKK                          | 1608.73 | 41.25 | 32.23  |
| 99  | P22059 | MLAEs*DEs*GDEESVSQTDKTELQNTLR            | 3172.29 | 52.80 | 65.54  |
|     |        | mLAESDEs*GDEEs*VSQTDKTELQNTLR            | 3188.29 | 49.88 | 57.18  |
| 100 | P22492 | KPRAt*t*PK                               | 1058.48 | 16.87 | 23.50  |
| 101 | P23193 | EPAITSQNs*PEAR                           | 1479.65 | 27.76 | 43.17  |
|     |        | KKEPAIt*SQNSPEAR                         | 1735.84 | 22.90 | 31.19  |
|     |        | KKEPAITSQNs*PEAR                         | 1735.84 | 23.76 | 25.76  |
| 102 | P23396 | DEILPTt*PISEQK                           | 1550.73 | 47.13 | 41.49  |
| 103 | P23497 | VIGQDHDFs*Es*s*EEEAPAEASSGALR            | 2958.13 | 53.44 | 49.83  |
| 104 | P23588 | SQSSDt*EQQs*PTSGGGK                      | 1840.66 | 21.10 | 33.94  |
|     |        | SQs*SDTEQQSPTSGGGK                       | 1760.70 | 20.37 | 44.72  |
|     |        | SRT*GSESSQTGTSTTSSR                      | 1896.80 | 18.28 | 67.49  |
|     |        | SRTGs*Es*SQTGTSTTSSR                     | 1976.75 | 19.23 | 58.11  |
|     |        | SRTGs*ESSQTGTSTTSSR                      | 1896.79 | 18.36 | 50.68  |
|     |        | t*GSESSQTGTSTTSSR                        | 1653.66 | 19.36 | 89.12  |
|     |        | TGSEs*s*QTGTSTTSSR                       | 1733.63 | 21.79 | 61.03  |
|     |        | TGs*ESSQTGTSTTSSR                        | 1653.65 | 19.43 | 90.84  |
| 105 | P24534 | YGPADVEDTTGSGATDSKDDDDIDLFGs*DDEEESEEAK  | 4104.60 | 57.30 | 64.03  |
|     |        | YGPADVEDTTGSGATDSKDDDDIDLFGs*DDEEESEEAKR | 4260.69 | 52.12 | 80.64  |
| 106 | P25205 | DGDs*YDPYDFSDTEEEMPQVHTPK                | 2882.10 | 57.02 | 40.47  |
|     |        | DGDs*YDPYDFSDTEEEMPQVHt*PK               | 2962.07 | 61.84 | 33.46  |
|     |        | DGDSYDPYDFSDt*EEEMPQVHTPK                | 2882.11 | 57.25 | 30.64  |
|     |        | DGDSYDPy*DFSDTEEEMPQVHTPK                | 2882.10 | 57.02 | 29.03  |
|     |        | DGDSYDPYDFs*DTEEEMPQVHt*PK               | 2962.07 | 61.84 | 31.78  |
|     |        | SEDEs*Et*EDEEEKSQEDQEQR                  | 2844.03 | 23.68 | 79.26  |
| 107 | P25788 | Es*LKEEDESDDDNM                          | 1735.59 | 33.73 | 24.67  |

|     |        |                                          |         |       |        |
|-----|--------|------------------------------------------|---------|-------|--------|
|     |        | ESLKEEDEs*DDDNM                          | 1735.59 | 33.72 | 24.05  |
| 108 | P27361 | IADPEHDHTGFLt*Ey*VATR                    | 2331.97 | 48.14 | 56.65  |
|     |        | IADPEHDHTGFLTEy*VATR                     | 2252.00 | 44.23 | 37.81  |
| 109 | P27816 | DMEs*PTKLDVTLAK                          | 1627.76 | 45.77 | 74.50  |
|     |        | ETERAs*PIKMDLAPSK                        | 1852.89 | 34.61 | 22.21  |
| 110 | P27824 | AEDEILNRs*PR                             | 1508.67 | 32.95 | 45.46  |
|     |        | QKs*DAEEDGGTVs*QEEEDRKPK                 | 2622.06 | 23.70 | 77.87  |
|     |        | QKs*DAEEDGGTVSQQEEEDRKPK                 | 2542.10 | 24.37 | 41.48  |
|     |        | SDAEEDGGTVs*QEEEDRKPK                    | 2285.93 | 24.52 | 32.04  |
| 111 | P28290 | SQs*LPTLLS*PVR                           | 1558.73 | 61.98 | 43.20  |
|     |        | SQs*LPTLLSPVR                            | 1478.76 | 56.27 | 78.08  |
| 112 | P28482 | VADPDHDHTGFLt*Ey*VATR                    | 2303.93 | 46.63 | 76.76  |
|     |        | VADPDHDHTGFLTEy*VATR                     | 2223.97 | 42.80 | 55.20  |
| 113 | P29353 | ELFDDPs*YVNVQNLDK                        | 1975.87 | 59.36 | 50.06  |
| 114 | P29692 | ATAPQTQHV*s*PMR                          | 1503.68 | 24.91 | 81.52  |
|     |        | ATAPQTQHV*s*PmR                          | 1519.67 | 20.84 | 53.76  |
|     |        | KPAt*PAEDEDDDDIDLFGs*DNEEEDKEAAQLR       | 3737.50 | 55.49 | 98.68  |
|     |        | KPATPAEDEDDDDIDLFGs*DNEEEDKEAAQLR        | 3657.52 | 50.99 | 127.72 |
|     |        | KPATPAEDEDDDDIDLFGs*DNEEEDKEAAQLREER     | 4071.71 | 49.30 | 83.26  |
|     |        | LNVLEKS*s*PGHR                           | 1416.70 | 27.16 | 44.52  |
|     |        | QVEPPAKKPATPAEDEDDDDIDLFGs*DNEEEDKEAAQLR | 4406.93 | 47.89 | 62.25  |
| 115 | P29966 | EAPAEGEAAEPGSPt*AAEGEAASAASSTSSPK        | 2995.27 | 43.12 | 79.45  |
|     |        | EAPAEGEAAEPGs*PTAAEGEAASAASSTSSPK        | 2995.27 | 43.00 | 84.08  |
|     |        | LSGFs*FKK                                | 993.48  | 40.07 | 39.47  |
| 116 | P30050 | IGPLGLs*PK                               | 961.51  | 46.99 | 60.56  |
| 117 | P30530 | y*VLcPSTTPSPAQPADR                       | 1939.86 | 39.40 | 28.52  |
| 118 | P31943 | HTGPNs*PDTANDGFVR                        | 1764.73 | 31.41 | 109.11 |
| 119 | P33991 | QRPDLGs*AQK                              | 1179.55 | 21.32 | 44.42  |
| 120 | P35221 | TPEELDDs*DFETEDFDVR                      | 2238.86 | 60.60 | 132.60 |
| 121 | P35269 | IHDLEDDLEMs*s*DAs*DAs*GEEGGRVPK          | 3179.13 | 61.56 | 47.23  |
| 122 | P35579 | GAGDGs*DEEVDGKADGAEAKPAE                 | 2254.90 | 27.13 | 14.96  |
|     |        | KGAGDGs*DEEVDGK                          | 1443.56 | 19.60 | 97.47  |
|     |        | KGAGDGs*DEEVDGKADGAEAKPAE                | 2382.99 | 24.56 | 70.89  |
| 123 | P35606 | s*TAQQELDGKSPASPTVIVASHTANKEEK           | 3113.51 | 33.01 | 34.36  |
|     |        | STAQQELDGKPA*s*PTVIVASHTANKEEK           | 3113.52 | 34.26 | 26.83  |
| 124 | P35659 | KEs*Es*EDs*s*DDEPLIK                     | 2127.67 | 60.34 | 22.38  |
|     |        | KEs*Es*EDs*s*DDEPLIKK                    | 2255.77 | 42.85 | 11.51  |
| 125 | P36507 | LNQPGt*PTR                               | 1063.49 | 22.08 | 47.80  |
| 126 | P38159 | GLPPs*MER                                | 966.41  | 31.21 | 43.22  |
| 127 | P40222 | RPEGGAQAPSs*PR                           | 1486.68 | 22.04 | 47.36  |
| 128 | P41236 | IDEPSTPy*HSMMGDDEDAcSDTEATEAMAPDILAR     | 3921.54 | 61.11 | 49.45  |
|     |        | IQQEs*s*GEEDSDLSPEER                     | 2323.85 | 41.19 | 147.84 |
|     |        | IQQEs*s*GEEDSDLSPEEREK                   | 2580.99 | 34.55 | 52.35  |
|     |        | YRIQQEs*s*GEEDSDLSPEER                   | 2643.02 | 41.39 | 74.39  |

|     |        |                                  |         |       |       |
|-----|--------|----------------------------------|---------|-------|-------|
| 129 | P42167 | EQGTESRSs*t*PLPTISSAENTR         | 2595.10 | 39.16 | 20.91 |
|     |        | GPPDFs*s*DEEREPT*PVLGSGAAAAGR    | 2810.10 | 55.98 | 39.91 |
|     |        | GPPDFs*s*DEEREPTPVLGSGAAAAGR     | 2730.14 | 50.63 | 66.20 |
|     |        | GPPDFSSDEEREPT*PVLGSGAAAAGR      | 2650.17 | 44.02 | 37.77 |
|     |        | LREQGTES*R                       | 1155.51 | 18.26 | 23.65 |
|     |        | SSi*PLPTISSAENTR                 | 1727.79 | 39.19 | 56.50 |
| 130 | P43243 | RDs*FDDRGPVSLNPVLDYDHGSR         | 2598.14 | 45.79 | 36.58 |
|     |        | SYs*PDGKEs*PSDKK                 | 1684.65 | 19.98 | 68.57 |
|     |        | s*y*SPDGKEs*PSDKK                | 1764.62 | 21.55 | 21.99 |
|     |        | s*Ys*PDGKEs*PSDKK                | 1764.62 | 21.72 | 26.26 |
|     |        | SYs*PDGKESPSDKK                  | 1604.68 | 19.89 | 48.64 |
| 131 | P46821 | Es*s*PLYSPTFSDSTSAVK             | 2062.83 | 54.61 | 45.38 |
|     |        | ESs*PLYS*PTFSDSTSAVK             | 2062.83 | 54.15 | 28.04 |
|     |        | s*LMSs*PEDLTKDFEELKAEEDVTK       | 3000.31 | 76.89 | 31.07 |
|     |        | SLMs*s *PEDLTKDFEELKAEEDVTK      | 3000.31 | 76.27 | 37.77 |
|     |        | VLs*PLRs*PPLIGSESAYESFLSADDKASGR | 3309.55 | 66.94 | 48.95 |
| 132 | P47712 | HIVSNDSSDs*DDESHEPK              | 2077.80 | 21.74 | 24.39 |
|     |        | HIVSNDs*s*Ds*DDESHEPK            | 2237.73 | 26.95 | 13.30 |
|     |        | HIVs*NDSs*DSDESHEPK              | 2157.77 | 23.24 | 16.66 |
| 133 | P48634 | LIPGPLs*PVAR                     | 1199.65 | 49.20 | 43.31 |
| 134 | P49006 | LSGLs*FKR                        | 987.50  | 37.26 | 52.40 |
| 135 | P49321 | s*LQENEEEEIGNLELAWDMLDLAK        | 2869.30 | 83.58 | 72.33 |
| 136 | P49736 | GLLYDs*DEEDEERPAR                | 1973.81 | 40.92 | 56.01 |
| 137 | P49736 | GNDPLTs*PGR                      | 1180.50 | 30.60 | 66.13 |
|     |        | RGLLYDs*DEEDEERPAR               | 2129.91 | 35.81 | 26.30 |
|     |        | RGNDPLTs*SPGR                    | 1336.60 | 26.92 | 10.40 |
|     |        | RGNDPLt*SSPGR                    | 1336.60 | 27.33 | 30.82 |
|     |        | RTDALTs*PGR                      | 1240.57 | 22.88 | 38.16 |
| 138 | P49756 | LGASNs*PGQPNSVK                  | 1435.66 | 25.16 | 64.81 |
| 139 | P49841 | GEPNVs*YIcSR                     | 1361.55 | 37.14 | 50.53 |
| 140 | P49959 | GVDFEs*s*EDDDDDPFMNTSSLR         | 2637.91 | 74.43 | 26.38 |
| 141 | P50395 | KKNDIy*GED                       | 1161.48 | 21.04 | 22.64 |
| 142 | P50914 | AALLKAs*PK                       | 978.54  | 24.93 | 49.74 |
| 143 | P51116 | t*DGSIs*GDRQPVTVADYISR           | 2296.99 | 54.90 | 22.30 |
|     |        | TDGs*Is*GDRQPVTVADYISR           | 2296.98 | 53.85 | 56.59 |
| 144 | P51858 | AGDLEDs*PK                       | 1124.49 | 36.55 | 43.71 |
|     |        | AGDLEDs*PKRPK                    | 1505.74 | 28.47 | 51.12 |
|     |        | GNAEGs*s*DEEGKLVIDEPAK           | 2204.89 | 42.65 | 44.82 |
|     |        | GNAEGs*s*DEEGKLVIDEPAKEK         | 2462.04 | 37.30 | 41.44 |
|     |        | RAGDLEDs*PKRPK                   | 1661.84 | 28.91 | 44.50 |
| 145 | P52292 | NVSSFPDDAt*SPLQENR               | 1956.84 | 45.87 | 29.06 |
|     |        | NVs*SFDDATSPLQENR                | 1956.84 | 46.06 | 27.66 |
|     |        | NVSSFPDDATs*PLQENR               | 1956.84 | 46.15 | 51.85 |
| 146 | P53396 | AKPAMPQDSVPs*PR                  | 1560.72 | 31.18 | 57.62 |

|     |        |                                                        |         |       |        |
|-----|--------|--------------------------------------------------------|---------|-------|--------|
|     |        | TAs*FSESR                                              | 964.38  | 25.14 | 51.45  |
|     |        | t*ASFSESRRADEVAPAK                                     | 1745.78 | 32.11 | 22.08  |
| 147 | P54105 | FEEESKEPVADEEEEDs*DDDVPEITEFR                          | 3394.35 | 52.38 | 107.02 |
| 148 | P55081 | IVEPEVVGES*D <sub>s</sub> *EVEGDAWR                    | 2361.94 | 64.52 | 88.31  |
|     |        | MERED <sub>s</sub> *s*EEEEEEIDDEEIER                   | 2786.97 | 45.55 | 70.55  |
|     |        | RPDYAPME <sub>s</sub> *s*DEEDEFQFIKK                   | 2850.13 | 55.35 | 57.39  |
| 149 | P55884 | ALENGDADEPs*FSDPEDFVDDVSEELLGDVLK                      | 3675.57 | 82.99 | 38.31  |
|     |        | ALENGDADEPs*FSDPEDFVDDV <sub>s</sub> *EEELLGDVLK       | 3755.50 | 84.46 | 53.90  |
|     |        | TEPAAEAEAASGPs*ESPPAAEELPGSHAEPVPAQGEAPGEQAR           | 4538.03 | 45.78 | 26.50  |
| 150 | P56524 | QEPIEs*DEEEAEPREVEPGQR                                 | 2630.12 | 37.56 | 35.29  |
| 151 | P58107 | QVs*ASELHTSGILGPETLR                                   | 2075.01 | 50.02 | 84.35  |
|     |        | RQVs*ASELHTSGILGPETLR                                  | 2231.12 | 45.20 | 61.87  |
| 152 | P62753 | LSs*LRAs*TSK                                           | 1209.53 | 25.23 | 39.42  |
|     |        | LSs*LRAs*TSKSESSQK                                     | 1855.82 | 22.22 | 48.41  |
|     |        | Ls*s*LRAS <sub>t</sub> SKSESSQK                        | 1855.82 | 22.02 | 29.35  |
|     |        | RLSs*LR                                                | 811.42  | 24.95 | 37.72  |
|     |        | RLs*s*LR                                               | 891.38  | 30.72 | 28.50  |
|     |        | RLSs*LRAs*TSK                                          | 1365.63 | 25.34 | 20.71  |
|     |        | R Ls*s*LRAs <sub>t</sub> SK                            | 1445.59 | 32.03 | 15.08  |
|     |        | RLs*s*LRAs*TSK                                         | 1445.59 | 32.32 | 17.87  |
|     |        | RRLs*s*LR                                              | 1047.49 | 27.61 | 30.61  |
| 153 | P62995 | RHs*Hs*Hs*PMSTR                                        | 1659.56 | 21.55 | 20.12  |
|     |        | RRs*Ps*PYYSR                                           | 1428.58 | 24.48 | 27.77  |
|     |        | Rs*Ps*PYYSR                                            | 1272.48 | 27.53 | 34.52  |
|     |        | s*Ps*PYYSR                                             | 1116.38 | 35.08 | 23.18  |
| 154 | P67809 | NYQQNYQNs*ESGEKNEGSESAPEGQAQQR                         | 3337.36 | 27.72 | 69.21  |
|     |        | NYQQNYQNs*Es*GEKNEGSESAPEGQAQQR                        | 3417.33 | 30.74 | 16.79  |
| 155 | P78333 | VMGQMGRSLLPs*R                                         | 1511.72 | 76.25 | 21.44  |
| 156 | P80723 | ETPAATEAPs*TPK                                         | 1466.64 | 24.69 | 24.72  |
|     |        | ETPAATEAPs <sub>t</sub> *PK                            | 1466.64 | 24.75 | 27.67  |
| 157 | P85037 | EGs*PIPHDPEFGSK                                        | 1576.67 | 36.95 | 14.94  |
|     |        | s*APAs*PTHPGLMSPR                                      | 1665.69 | 37.54 | 73.48  |
|     |        | SGGLQt*PEcLs*REGSPIPHDPEFGSK                           | 2942.24 | 47.11 | 10.24  |
|     |        | SGGLQt*PEcLs*REGs*PIPHDPEFGSK                          | 3022.22 | 50.47 | 28.67  |
| 158 | P98082 | SSPNPFVGS*PPK                                          | 1293.59 | 42.36 | 34.76  |
| 159 | P98175 | GLVAA <sub>s</sub> *GEs*D <sub>s</sub> *EEEQERGGPEREEK | 3078.17 | 39.83 | 20.98  |
|     |        | LASDDRPs*PPR                                           | 1290.59 | 25.21 | 34.77  |
| 160 | Q00613 | VKEEPPs*PPQs*PR                                        | 1607.69 | 28.60 | 14.78  |
| 161 | Q00839 | AKs*QPPVEEEDHFDDTVVcLDTYNcDLHFK                        | 3914.65 | 55.78 | 59.37  |
| 162 | Q01082 | RPPs*PEPSTK                                            | 1175.55 | 18.88 | 40.85  |
|     |        | TSSKEs*s*PIPs*PTSDRK                                   | 2043.81 | 27.07 | 53.68  |
| 163 | Q01105 | RQs*PLPPQK                                             | 1130.57 | 20.53 | 20.49  |
| 164 | Q01130 | s*Rs*PPPVSK                                            | 1114.47 | 20.07 | 26.53  |
|     |        | s*Rs*Rs*PPPVSK                                         | 1437.57 | 20.46 | 14.96  |

|     |        |                                        |         |       |        |
|-----|--------|----------------------------------------|---------|-------|--------|
| 165 | Q01831 | SEAAAPHTDAGGGLs*s*DEEEGTSSQAEAAAR      | 3048.17 | 35.99 | 61.62  |
| 166 | Q02880 | KAs*Gs*ENEGDYNPGRK                     | 1868.72 | 21.37 | 15.05  |
|     |        | KTSFDQDs*DVDIFPSDFPTEPPSLPR            | 3017.35 | 64.82 | 60.37  |
|     |        | KVVEAVNs*D*s*DSEFGIPK                  | 2080.89 | 49.91 | 18.54  |
|     |        | VVEAVNs*DSDs*EFGIPK                    | 1952.80 | 58.77 | 27.21  |
|     |        | VVEAVNs*D*DSEFGIPK                     | 1952.79 | 58.74 | 32.85  |
| 167 | Q02952 | RP*s*Es*DKEDELDKVK                     | 1934.81 | 28.69 | 32.97  |
| 168 | Q04637 | s*FSKEVEER                             | 1190.51 | 28.28 | 41.04  |
|     |        | SFs*KEVEER                             | 1190.51 | 31.52 | 35.96  |
| 169 | Q04695 | QFTs*s*s*SIKSSGLGGSSR                  | 2046.85 | 36.13 | 20.19  |
|     |        | QFTSSs*SIKSSGLGGSSR                    | 1966.89 | 31.65 | 28.80  |
| 170 | Q04721 | GGs*DLs*DEDEDAEDSSANIITDLVYQGASLQAQTDR | 4032.65 | 85.15 | 37.09  |
| 171 | Q04726 | ESSANNSVs*PSESLR                       | 1643.69 | 31.71 | 30.37  |
| 172 | Q05519 | KLs*Rs*Ps*PR                           | 1267.49 | 19.12 | 20.31  |
|     |        | KPIETGs*PK                             | 1036.51 | 18.42 | 34.01  |
| 173 | Q06210 | VDs*TTcLFPVEEK                         | 1604.69 | 53.49 | 46.85  |
| 174 | Q07343 | SDSDYDLs*PK                            | 1206.46 | 35.96 | 49.76  |
| 175 | Q07666 | SGs*MDPSGAHPSVR                        | 1464.59 | 26.25 | 67.11  |
|     |        | s*GSmDPSGAHPSVR                        | 1480.58 | 21.72 | 42.28  |
| 176 | Q07955 | VKVDGPRs*Ps*YGR                        | 1577.68 | 26.66 | 20.79  |
| 177 | Q08945 | EGMNPSYDEYADs*DEDQHDAYLER              | 2929.08 | 46.56 | 96.36  |
|     |        | EGmNPSYDEYADs*DEDQHDAYLER              | 2945.07 | 43.16 | 12.63  |
|     |        | SKEFVs*s*DEs*s*SGENKSK                 | 2251.75 | 30.16 | 23.66  |
| 178 | Q08J23 | AGEPNs*PDAAEAns*PDVTAGcDPAGVHPPR       | 3174.25 | 42.46 | 102.82 |
|     |        | AGEPNs*PDAAEANS*PDVTAGcDPAGVHPPR       | 3094.29 | 40.01 | 113.59 |
| 179 | Q09161 | Kt*SDANETEDHLESLIcK                    | 2169.94 | 46.29 | 20.47  |
| 180 | Q09666 | As*LGSLEGEAEAEASSPK                    | 1812.78 | 56.87 | 69.19  |
|     |        | ASLGSLEGEAEAEAs*s*PK                   | 1892.76 | 62.00 | 18.15  |
|     |        | DIDISs*PEFK                            | 1230.53 | 50.26 | 14.43  |
|     |        | FGTFGGLGs*K                            | 1050.47 | 48.29 | 55.00  |
|     |        | FKAEAPLPs*PK                           | 1264.63 | 34.54 | 31.61  |
|     |        | GGVTGs*PEASISGSK                       | 1413.62 | 32.08 | 71.25  |
|     |        | GKGGVt*GSPEASISGSK                     | 1598.74 | 26.61 | 40.49  |
|     |        | GKGGVTGs*PEASISGSK                     | 1598.74 | 27.04 | 39.83  |
|     |        | HRs*Ns*FSDER                           | 1394.49 | 21.57 | 19.87  |
|     |        | Is*APNVDFNLEGPK                        | 1580.73 | 56.06 | 26.90  |
|     |        | ISMQDVDSLGS*PK                         | 1569.72 | 57.29 | 65.52  |
|     |        | LKs*EDGVEGDLGETQSR                     | 1899.83 | 34.20 | 99.55  |
|     |        | LPs*GSGAAs*PTGSAVDIR                   | 1802.77 | 46.54 | 75.67  |
|     |        | LPs*GSGAASPTGSAVDIR                    | 1722.81 | 40.93 | 80.23  |
|     |        | SKGHy*EVTGs*DDETGKLQSGVSLASK           | 2897.26 | 35.96 | 10.18  |
|     |        | TVIRLPs*GSGAAs*PTGSAVDIR               | 2272.07 | 51.61 | 69.97  |
|     |        | TVIRLPs*Gs*GAASPTGSAVDIR               | 2272.07 | 50.92 | 28.44  |
|     |        | TVIRLPs*GSGAASPTGSAVDIR                | 2192.11 | 47.55 | 14.22  |

|     |        |                                          |         |       |        |
|-----|--------|------------------------------------------|---------|-------|--------|
|     |        | TVIRLPSGs*GAAs*PTGSAVDIR                 | 2272.07 | 51.72 | 57.43  |
|     |        | VDVKs*PK                                 | 852.42  | 18.56 | 40.86  |
| 181 | Q0ZGT2 | EMLAs*DDEEDVSSKVEK                       | 1990.82 | 38.30 | 43.20  |
| 182 | Q12888 | GGPGKs*PR                                | 948.47  | 21.06 | 46.73  |
|     |        | SKLPDGt*Gs*SEEEEFLEIPPFNK                | 2936.26 | 69.67 | 17.33  |
|     |        | STPFIVPSs*PTEQEGR                        | 1811.82 | 47.77 | 31.48  |
| 183 | Q13185 | KSLs*DSESDDSK                            | 1377.54 | 19.21 | 26.61  |
|     |        | KSLs*DSESDDs*KSK                         | 1672.63 | 18.77 | 14.69  |
|     |        | RKs*Ls*DSESDDSK                          | 1613.61 | 18.96 | 61.91  |
|     |        | RKs*LSDs*ESDDSK                          | 1613.61 | 19.09 | 53.84  |
|     |        | SLs*DSESDDSK                             | 1249.44 | 21.75 | 78.89  |
|     |        | SLs*DSESDDSKSK                           | 1464.57 | 19.24 | 63.12  |
| 184 | Q13242 | Gs*PHYFs*PFRPY                           | 1614.62 | 62.73 | 36.09  |
| 185 | Q13247 | ARs*Vs*PPPKR                             | 1254.57 | 18.78 | 41.08  |
|     |        | SNs*PLVPPSK                              | 1202.58 | 33.35 | 40.71  |
|     |        | s*Vs*PPPKR                               | 1027.44 | 19.52 | 43.30  |
| 186 | Q13263 | LASPSGSTs*s*GLEVVAPeGt*SAPGGPGTLDDSATIcR | 3798.59 | 73.13 | 33.27  |
|     |        | LASPSGs*TSSGLEVVAPeGTSAPGGPGTLDDSATIcR   | 3638.66 | 56.15 | 23.48  |
|     |        | LASPSGs*t*s*SGLEVVAPeGTSAPGGPGTLDDSATIcR | 3798.57 | 72.73 | 22.87  |
|     |        | SRs*GEGEVSGLMR                           | 1444.63 | 35.25 | 23.05  |
|     |        | s*TAPSAASASASAAAASSPAGGGAEALELLEHcGVcR   | 3522.57 | 59.15 | 39.37  |
| 187 | Q13283 | SSs*PAPADIAQTVQEDLR                      | 1964.90 | 61.51 | 147.05 |
|     |        | YQDEVFGGFVTEPQEEs*EEEEVEEPEER            | 3296.33 | 63.64 | 76.24  |
| 188 | Q13286 | RFs*Ds*EGEETVPEPR                        | 1894.72 | 38.58 | 24.44  |
| 189 | Q13428 | AALAPAKEs*PR                             | 1190.59 | 21.74 | 68.26  |
|     |        | AASAPAKEs*PR                             | 1164.54 | 18.05 | 63.41  |
|     |        | KLs*GDQPAAR                              | 1122.53 | 19.15 | 64.15  |
|     |        | LGAGEGGEAs*VSPEKTSTTSK                   | 2072.94 | 26.74 | 61.43  |
|     |        | TSQVGAASAPAKEs*PR                        | 1636.77 | 21.15 | 108.58 |
| 190 | Q13435 | GFEEHKDs*DDDs*s*DDEQEKKPEAPK             | 3231.16 | 26.17 | 58.55  |
|     |        | Ss*LGQs*ASETEEDTVSVSKK                   | 2228.92 | 36.34 | 42.98  |
|     |        | SSLGQs*As*ETEEDTVSVSKK                   | 2228.93 | 36.72 | 82.81  |
| 191 | Q13442 | Ks*LDs*DESEDEDDYQQKR                     | 2475.90 | 30.47 | 51.26  |
|     |        | SLDs*DEs*EDEEDDYQQK                      | 2191.71 | 40.53 | 68.55  |
|     |        | s*LDSDEs*EDEEDDYQQK                      | 2191.71 | 40.30 | 74.93  |
|     |        | SLDs*DEs*EDEEDDYQQKR                     | 2347.81 | 34.40 | 124.06 |
| 192 | Q13501 | LTPVs*PESSSTEEK                          | 1570.69 | 30.59 | 47.80  |
|     |        | SRLt*PVs*PESSSTEEK                       | 1893.79 | 30.26 | 22.41  |
| 193 | Q13523 | AKs*Rs*LER                               | 1106.48 | 17.88 | 18.99  |
|     |        | KKs*PIINESR                              | 1251.65 | 22.72 | 28.21  |
|     |        | LcDFGSASHVADNDITPy*LVSr                  | 2517.11 | 53.66 | 29.94  |
|     |        | s*Ls*PKPR                                | 944.40  | 21.48 | 33.11  |
|     |        | s*Rs*PLLNDRR                             | 1373.61 | 25.60 | 14.12  |
|     |        | s*Rs*PVDLR                               | 1089.45 | 29.35 | 21.19  |

|     |        |                                            |         |       |       |
|-----|--------|--------------------------------------------|---------|-------|-------|
| 194 | Q13541 | RVVLGDGVQLPPGDy*STTPGGTLFSTt*PGGTR         | 3363.57 | 62.30 | 35.36 |
| 195 | Q13547 | IACeEEEFs*Ds*EEEGEGGRK                     | 2317.81 | 36.09 | 38.27 |
|     |        | MLPHAPGVQMQAIPEDAIPeEs*GDEDEDDPDKR         | 3711.58 | 51.24 | 32.04 |
| 196 | Q13595 | RRs*Ps*PYYSR                               | 1428.58 | 25.27 | 30.34 |
|     |        | s*Rs*Hs*PMSNR                              | 1398.44 | 19.79 | 26.09 |
|     |        | Rs*Ps*PYYSR                                | 1272.48 | 27.36 | 39.63 |
| 197 | Q13596 | LPPFPGLEPESEGAAGGs*EPEAGDs*DTEGEDIFTGAAVVS | 4273.82 | 82.62 | 48.00 |
| 198 | Q13610 | EKLQEEGGGs*DEEETGSPSEDGMQSAR               | 2919.14 | 32.36 | 37.46 |
|     |        | LQEEGGGs*DEEETGSPSEDGMQSAR                 | 2662.01 | 34.96 | 31.81 |
| 199 | Q13765 | VQGEAVSNIQENTQTPTVQEEs*EEEEVDetGVEVK       | 3940.73 | 50.55 | 72.37 |
| 200 | Q13895 | MPQDGs*DDEDEEWPTLEK                        | 2200.82 | 55.35 | 32.05 |
| 201 | Q14103 | IDASKNEEDEGHsNSs*PR                        | 2051.83 | 19.49 | 49.65 |
|     |        | NEEDEGHsNSs*SPR                            | 1537.55 | 18.02 | 21.15 |
| 202 | Q14137 | IGDEYAEDs*s*DEEDIR                         | 2002.69 | 47.98 | 99.88 |
| 203 | Q14155 | Rs*SLSR                                    | 785.37  | 17.68 | 22.12 |
|     |        | RSSLs*R                                    | 785.37  | 18.06 | 20.02 |
| 204 | Q14157 | RYPs*SISSs*PQKDLTQAK                       | 2152.96 | 36.55 | 34.56 |
|     |        | RYPSs*Is*SSPQKDLTQAK                       | 2152.97 | 37.52 | 48.68 |
|     |        | STs*APQMSPGSSDNQSSSPQAQQK                  | 2612.09 | 29.05 | 18.66 |
| 205 | Q14160 | LPLLPEs*PGPLR                              | 1465.78 | 56.96 | 42.08 |
|     |        | QSPAs*PPPLGGAPVR                           | 1567.76 | 39.01 | 31.60 |
| 206 | Q14166 | SSPGQt*PEEGAQALAEFAALHGPALR                | 2685.27 | 65.73 | 51.05 |
| 207 | Q14204 | TDs*TSDGRPAWMR                             | 1559.63 | 39.74 | 21.43 |
| 208 | Q14247 | AKt*QTPPVs*PAPQPTEER                       | 2093.93 | 28.93 | 18.09 |
|     |        | GPVSGTEPEPVy*SMEAADy*R                     | 2314.90 | 54.48 | 16.71 |
|     |        | GPVSGTEPEPVy*SMEAADYR                      | 2234.91 | 51.18 | 30.89 |
|     |        | GPVSGTEPEPVYs*MEAADy*R                     | 2314.89 | 54.29 | 24.31 |
|     |        | LPSSPVy*EDAASFK                            | 1590.72 | 47.63 | 20.65 |
|     |        | TQt*PPVs*PAPQPTEER                         | 1894.80 | 34.38 | 56.79 |
|     |        | TQt*PPVs*PAPQPt*EERLPSSPVYEDAASFK          | 3466.48 | 60.35 | 27.87 |
| 209 | Q14498 | DKs*PVREPIDNLTPEER                         | 2074.98 | 37.39 | 58.38 |
|     |        | YRs*PYSGPK                                 | 1134.50 | 24.56 | 22.40 |
| 210 | Q14669 | AQTAPt*KTSPR                               | 1237.59 | 18.23 | 23.69 |
|     |        | AQTAPTKt*SPR                               | 1237.60 | 18.28 | 31.46 |
| 211 | Q14676 | SQt*TTERDSDt*DVEEEELPVENR                  | 2839.12 | 43.05 | 55.02 |
|     |        | SQTTTERDs*Dt*DVEEEELPVENR                  | 2839.13 | 42.82 | 45.12 |
| 212 | Q14694 | NHSVNEEEQEEQGEGs*EDEWEQVGPR                | 3107.22 | 42.04 | 66.76 |
| 213 | Q14978 | GGsISVQVNSIKFDs*E                          | 1746.79 | 54.32 | 41.76 |
|     |        | IKLQt*PNt*FPK                              | 1446.68 | 41.92 | 20.50 |
|     |        | LQt*PNt*FPK                                | 1205.50 | 41.79 | 47.79 |
| 214 | Q14980 | TQPDGTSVPGEPAs*PISQR                       | 2003.91 | 37.65 | 27.18 |
| 215 | Q15019 | IYHLPDAEs*DEDEDFKEQTR                      | 2517.04 | 42.63 | 84.65 |
| 216 | Q15021 | YQPLAs*TA*s*DNDNFVTPPEPR                   | 2267.92 | 59.12 | 35.86 |
|     |        | YQPLAs*t*ASDNDNFVTPPEPR                    | 2267.92 | 58.86 | 31.92 |



|     |        |                               |         |       |        |
|-----|--------|-------------------------------|---------|-------|--------|
| 217 | Q15036 | LSs*KLSAVs*LR                 | 1320.63 | 41.85 | 47.12  |
| 218 | Q15054 | VALs*DDETKETENMR              | 1817.77 | 34.01 | 47.12  |
| 219 | Q15061 | LQAKEs*PQR                    | 1136.54 | 18.42 | 34.18  |
|     |        | LQAKEs*PQRK                   | 1264.64 | 17.52 | 18.71  |
| 220 | Q15149 | SDEGQLs*PATR                  | 1240.52 | 27.02 | 29.49  |
|     |        | SSs*VGSSSSYPISPAVSR           | 1834.82 | 41.47 | 104.97 |
|     |        | SSs*VGs*SSSYPIPAVSR           | 1914.79 | 49.67 | 85.22  |
|     |        | s*SSVGSSSSYPISPAVs*R          | 1914.79 | 45.95 | 66.44  |
|     |        | TQLAs*WSDPTEETGPVAGILDTELEK   | 2968.37 | 71.56 | 42.23  |
| 221 | Q15185 | DWEDDs*DEDMSNFDR              | 1955.63 | 56.92 | 104.29 |
|     |        | LNWLSVDFNNWKDWEDDs*DEDMSNFDR  | 3472.36 | 78.45 | 100.46 |
| 222 | Q15287 | SSTRAPs*PTK                   | 1111.51 | 18.02 | 26.51  |
| 223 | Q15365 | QIcLVMLETLs*PQGR              | 2039.96 | 67.32 | 65.24  |
|     |        | QIcLVMLETLs*QSPQGR            | 2039.96 | 67.41 | 43.67  |
|     |        | VMt*IPYQMPASSPVIcAGGQDR       | 2555.15 | 57.33 | 28.09  |
|     |        | VMTIPYQMPAs*SPVIcAGGQDR       | 2555.15 | 57.28 | 36.17  |
| 224 | Q15424 | SVVs*FDKVKEPR                 | 1470.74 | 36.04 | 33.46  |
|     |        | s*VV*s*FDKVKEPR               | 1550.70 | 38.29 | 74.94  |
| 225 | Q15435 | RVEs*EEs*GDEEGKK              | 1738.65 | 18.63 | 36.69  |
| 226 | Q15477 | As*SLEDLVLK                   | 1154.57 | 55.29 | 27.88  |
|     |        | ASs*LEDLVLK                   | 1154.57 | 55.30 | 49.42  |
| 227 | Q15637 | TGDLGIPPnPEDRs*Ps*PEPIYNSEGK  | 2926.25 | 50.41 | 28.65  |
|     |        | TGDLGIPPnPEDRs*Ps*PEPIYNSEGKR | 3082.36 | 45.29 | 26.43  |
| 228 | Q15942 | EKV*s*SIDLEIDSLSSLLDDMTK      | 2518.19 | 82.52 | 33.11  |
|     |        | EKV*s*SIDLEIDSLSSLLDDMTKNDPFK | 3119.48 | 82.14 | 54.97  |
|     |        | s*PGAPGPLTLK                  | 1117.57 | 42.32 | 40.76  |
| 229 | Q16204 | ILQEKLDPVs*APPs*PR            | 2034.97 | 41.26 | 40.04  |
|     |        | LDQPVs*APPs*PR                | 1423.60 | 36.50 | 55.53  |
| 230 | Q16513 | ASs*LGEIDESSELR               | 1572.68 | 45.72 | 58.36  |
| 231 | Q16555 | TVTPASSAKtsPAK                | 1505.66 | 20.82 | 33.46  |
|     |        | TVt*PASSAKTs*PAK              | 1505.66 | 20.97 | 36.55  |
| 232 | Q16637 | GtGQSDDs*DIWDDTALIK           | 2096.82 | 74.73 | 46.00  |
|     |        | GTGQs*DDs*DIWDDTALIK          | 2096.81 | 74.28 | 11.42  |
|     |        | RGTGQs*DDs*DIWDDTALIK         | 2252.91 | 62.71 | 70.97  |
| 233 | Q16643 | LSs*PVLHR                     | 988.50  | 27.20 | 58.07  |
| 234 | Q1KMD3 | EEDEPEERSGDEt*PGSEVPGDK       | 2467.96 | 31.00 | 12.84  |
|     |        | EEDEPEERS*GDETPGSEVPGDK       | 2467.95 | 30.76 | 29.35  |
|     |        | s*GDETPGSEVPGDK               | 1454.56 | 29.48 | 32.39  |
| 235 | Q53EL6 | DSGRGDs*VSDSGSDALR            | 1760.71 | 28.22 | 36.16  |
|     |        | SGLTVPTs*PK                   | 1066.52 | 34.89 | 18.30  |
| 236 | Q58FF8 | IEDVGs*DEEDDSGKDK             | 1574.57 | 29.29 | 37.71  |
|     |        | IEDVGs*DEEDDSGKDKK            | 1817.70 | 24.93 | 108.78 |
|     |        | IEDVGs*DEEDDSGK               | 1945.79 | 22.10 | 85.99  |
| 237 | Q5H9R7 | IQQFDDGGs*DEEDIWEEK           | 2219.87 | 57.27 | 71.53  |

|     |        |                               |         |       |       |
|-----|--------|-------------------------------|---------|-------|-------|
| 238 | Q5JTH9 | GDs*IEEILADSEDEEDNEEEER       | 2631.99 | 59.68 | 26.32 |
|     |        | GDSIEEILADs*EDEEDNEEEER       | 2631.99 | 59.44 | 27.88 |
| 239 | Q5T200 | LRs*Ps*NDSahr                 | 1399.55 | 18.32 | 29.08 |
|     |        | NTEEs*SSPVRK                  | 1313.57 | 18.16 | 16.20 |
|     |        | s*As*PYPSHLSs*PQR             | 1840.67 | 38.88 | 32.56 |
|     |        | s*Ls*PSHLTEDR                 | 1401.54 | 37.95 | 22.64 |
| 240 | Q5T5C0 | SSs*VTs*IDKESR                | 1455.57 | 28.09 | 38.17 |
|     |        | SSSVt*s*IDKESR                | 1455.58 | 28.09 | 60.36 |
| 241 | Q5VT52 | DVEDMELs*DVEDDGSK             | 1862.69 | 54.61 | 35.62 |
| 242 | Q5VTL8 | RSLs*PR                       | 795.39  | 18.31 | 28.00 |
| 243 | Q5VTR2 | ALVVPEPEPDSs*NQER             | 1961.85 | 43.04 | 31.82 |
| 244 | Q641Q2 | ASALLFs*s*DEEDQWNIPASQTHLASDR | 3235.36 | 67.05 | 41.82 |
| 245 | Q69YN4 | SFLSEPSs*PGR                  | 1243.54 | 41.24 | 33.64 |
| 246 | Q6KC79 | AITSLLGGGs*PK                 | 1180.60 | 48.49 | 67.78 |
|     |        | KSSPs*KENEs*s*Ds*EEEVSRPR     | 2683.95 | 25.19 | 55.98 |
|     |        | KSSs*Ps*KENEs*s*DSEEEVSRPR    | 2683.95 | 24.67 | 21.14 |
| 247 | Q6PD62 | KGGEFDEFVNDdt*DDDLPIsk        | 2436.00 | 55.41 | 34.42 |
|     |        | KGs*Gs*EQEGEDEEGGER           | 1939.66 | 20.93 | 37.50 |
| 248 | Q6PJG2 | TNSAEVt*PPVLS*VMGEAt*PVSIEPR  | 2821.22 | 84.26 | 29.59 |
| 249 | Q6PKG0 | ETESAPGs*PR                   | 1110.45 | 20.46 | 48.04 |
|     |        | GLs*ASLPDLSENWIEVK            | 2052.96 | 69.51 | 18.48 |
|     |        | KNTFTAWs*DEEs*DYEIDDRDVNK     | 2937.15 | 51.78 | 55.64 |
|     |        | NTFt*AWSDEEs*DYEIDDRDVNK      | 2809.06 | 57.87 | 30.69 |
|     |        | NTFt*AWs*DEESDYEIDDRDVNK      | 2809.06 | 58.17 | 12.68 |
|     |        | QHYQKEt*ESAPGs*PR             | 1874.75 | 21.76 | 61.17 |
|     |        | QHYQKETEs*APGs*PR             | 1874.75 | 22.26 | 74.57 |
|     |        | s*LPTTVPEs*PNYR               | 1620.67 | 48.59 | 49.09 |
|     |        | SLPTTVPEs*PNYR                | 1540.70 | 41.39 | 47.39 |
| 250 | Q76FK4 | LQDs*s*s*EEEDVTEETDHR         | 2345.78 | 43.10 | 31.74 |
| 251 | Q7L014 | AALGLQDs*DEEDAaVDIDEQIESMFNSK | 3106.31 | 82.77 | 74.83 |
| 252 | Q7L2J0 | TLNAETPKs*s*PLPAK             | 1713.79 | 31.54 | 24.94 |
|     |        | TLNAEt*PKs*SPLPAK             | 1713.79 | 31.67 | 25.45 |
| 253 | Q7L4I2 | EQSEVSVs*PR                   | 1197.52 | 27.47 | 52.48 |
| 254 | Q7Z2W4 | Set*Ps*PDQISHR                | 1544.56 | 29.91 | 44.40 |
| 255 | Q7Z309 | RIDFTPVs*PAPs*PTR             | 1800.80 | 46.66 | 25.79 |
| 256 | Q7Z417 | DYEIESQNPLAs*PTNTLLGSAK       | 2428.12 | 64.72 | 16.36 |
|     |        | NDs*WGSFDLR                   | 1276.50 | 59.02 | 33.59 |
| 257 | Q7Z4V5 | ARGDs*EALDEES                 | 1358.51 | 29.34 | 38.22 |
| 258 | Q7Z5K2 | RPEs*PSEIs*PIKGsvR            | 1898.88 | 33.22 | 36.65 |
|     |        | RPEs*Ps*EISPIKGsvR            | 1898.87 | 33.43 | 21.39 |
|     |        | VEEEst*GDPFGFDSDDesLPVSSK     | 2653.07 | 60.97 | 12.96 |
| 259 | Q7Z5L9 | KPs*PEPEGEVgPPK               | 1527.71 | 27.37 | 44.15 |
|     |        | LEEPPELNrQs*PNPR              | 1855.87 | 34.44 | 30.60 |
|     |        | RKPs*PEPEGEVgPPK              | 1683.81 | 24.94 | 24.84 |

|     |        |                                     |         |       |        |
|-----|--------|-------------------------------------|---------|-------|--------|
|     |        | RNs*Ns*PPs*PSSMNQR                  | 1898.66 | 32.47 | 14.85  |
| 260 | Q7Z6Z7 | DGGs*GNs*TIIVSR                     | 1422.57 | 43.21 | 37.45  |
|     |        | GSGTAs*DDEFENLR                     | 1577.61 | 44.29 | 103.40 |
| 261 | Q86UU0 | EAPGs*PLs*PR                        | 1267.51 | 36.28 | 40.63  |
| 262 | Q86VM9 | LGs*PKPER                           | 963.47  | 19.40 | 51.75  |
|     |        | LGVSVPs*R                           | 981.48  | 32.81 | 44.68  |
|     |        | LGVSVs*PSR                          | 981.48  | 32.77 | 46.83  |
|     |        | LGVs*Vs*PSR                         | 1061.44 | 38.87 | 47.90  |
| 263 | Q86VR2 | AMDNHs*Ds*EEELAAFcQLDDSTVAR         | 3068.17 | 61.98 | 44.12  |
| 264 | Q86XP3 | QQFHs*KPVDs*DSDDPLEAFMAEVEDQAAR     | 3537.42 | 78.05 | 70.70  |
|     |        | QQFHs*KPVSDs*DDDPLEAFMAEVEDQAAR     | 3537.43 | 78.42 | 60.77  |
|     |        | YMAENPt*AGVVQEEEEEDNLEYDSDGNPIAPTKK | 3733.60 | 53.54 | 10.97  |
| 265 | Q86YP4 | RPPs*PDVIVLs*DNEQPSs*PR             | 2430.00 | 52.60 | 30.86  |
|     |        | RPPs*PDVIVLs*DNEQPs*SPR             | 2430.01 | 52.66 | 28.56  |
| 266 | Q8IU81 | KAs*PEPEGEAAGK                      | 1350.59 | 18.82 | 46.64  |
| 267 | Q8IVT2 | ALs*SDSILSPAPDAR                    | 1579.73 | 48.89 | 24.76  |
| 268 | Q8IY81 | ALDISLs*s*GEEDEGDEEDSTAGTTK         | 2716.04 | 57.26 | 21.51  |
| 269 | Q8IYB3 | AAs*Ps*PQSVR                        | 1159.45 | 25.34 | 40.12  |
|     |        | APQTSSs*PPPVR                       | 1303.60 | 23.64 | 69.88  |
|     |        | APQTSSs*s*PPPVR                     | 1383.57 | 27.58 | 33.88  |
|     |        | APQTs*s*SPPPVR                      | 1383.56 | 27.58 | 39.14  |
|     |        | EKt*PELPEPSVK                       | 1433.69 | 34.86 | 32.23  |
|     |        | Gt*EKRESPs*PAPKPR                   | 1796.81 | 18.19 | 29.36  |
|     |        | HRPs*PPAtPPPK                       | 1441.64 | 22.18 | 44.82  |
|     |        | KAAAs*Ps*PQSVR                      | 1287.55 | 20.96 | 80.68  |
|     |        | KAAAs*Ps*PQs*VR                     | 1367.51 | 23.38 | 54.24  |
|     |        | KAAAs*PSPQSVR                       | 1207.58 | 19.30 | 64.24  |
|     |        | KEt*Es*EAEDNLDDLEK                  | 2024.76 | 46.09 | 100.63 |
|     |        | KETEs*EAEDNLDDLEK                   | 1944.80 | 40.97 | 131.52 |
|     |        | KSRVs*Vs*PGR                        | 1232.55 | 20.81 | 33.75  |
|     |        | KVELs*Es*EEDKGGK                    | 1694.69 | 24.67 | 93.05  |
|     |        | RAAs*Ps*PPPK                        | 1096.46 | 18.85 | 18.64  |
|     |        | RAAs*Ps*PPPKR                       | 1252.56 | 18.04 | 53.87  |
|     |        | Res*Ps*PAPKPR                       | 1381.60 | 18.66 | 53.21  |
|     |        | Res*PSPAPKPR                        | 1301.63 | 18.23 | 45.31  |
|     |        | RLs*Ps*As*PPR                       | 1307.49 | 31.05 | 36.66  |
|     |        | RLs*PSAs*PPR                        | 1227.53 | 28.31 | 41.90  |
|     |        | RLs*Ps*ASPPR                        | 1227.53 | 27.35 | 31.36  |
|     |        | RQs*PSPSt*RPPIR                     | 1541.70 | 22.82 | 31.57  |
|     |        | RRs*Ps*LSSK                         | 1177.51 | 19.17 | 19.56  |
|     |        | RRs*PSLs*SK                         | 1177.51 | 19.73 | 20.53  |
|     |        | RRs*Ps*PAPPPR                       | 1377.62 | 19.23 | 46.73  |
|     |        | RRs*Ps*PPPTR                        | 1310.58 | 19.30 | 44.03  |
|     |        | RRt*Ps*PPPR                         | 1223.54 | 19.13 | 35.57  |

|     |        |                              |         |       |       |
|-----|--------|------------------------------|---------|-------|-------|
|     |        | RRt*Pt*PPPR                  | 1237.56 | 19.42 | 31.98 |
|     |        | RVs*Hs*PPPK                  | 1164.50 | 17.92 | 43.39 |
|     |        | RVs*Hs*PPKQR                 | 1448.66 | 17.79 | 27.70 |
|     |        | RVs*Rt*PEPK                  | 1229.54 | 18.43 | 17.32 |
|     |        | RVs*s*s*RSVs*GSPEPAAK        | 2021.75 | 24.18 | 19.24 |
|     |        | RYs*PPIQR                    | 1096.53 | 27.86 | 24.77 |
|     |        | RYs*Ps*PPPK                  | 1188.48 | 23.85 | 39.10 |
|     |        | s*Ps*PAPPPR                  | 1065.42 | 25.35 | 40.04 |
|     |        | s*RVSVs*PGR                  | 1104.46 | 22.01 | 31.71 |
|     |        | SRVs*Vs*PGR                  | 1104.46 | 21.80 | 41.33 |
|     |        | SRVs*Vs*PGRMSGK              | 1477.66 | 21.64 | 24.96 |
|     |        | TAs*PPPPPK                   | 971.46  | 22.04 | 34.20 |
|     |        | t*As*PPPPPK                  | 1051.43 | 25.30 | 43.04 |
|     |        | t*As*PPPPPKR                 | 1207.53 | 21.26 | 54.92 |
|     |        | t*ASPPPPPKR                  | 1127.56 | 19.81 | 43.43 |
|     |        | TAs*PPPPPKR                  | 1127.56 | 20.45 | 37.57 |
|     |        | TRHs*PTPQSNR                 | 1488.67 | 17.90 | 32.10 |
| 270 | Q8IZ21 | SSs*PVQVEEEPVR               | 1522.67 | 34.52 | 39.20 |
| 271 | Q8IZP0 | LGSQHs*PGR                   | 1018.45 | 18.03 | 30.83 |
| 272 | Q8N163 | s*VAs*NQs*EMEFSSLQDMPK       | 2354.84 | 79.74 | 66.09 |
| 273 | Q8N556 | SGTSSPQs*PVFR                | 1329.59 | 33.62 | 35.51 |
| 274 | Q8N7R7 | s*FSADNFIGIQR                | 1434.64 | 57.97 | 31.89 |
| 275 | Q8N9T8 | y*VDEENSGETSNHR              | 1831.68 | 22.22 | 22.43 |
| 276 | Q8NAV1 | VSALEEDMDDVEs*s*EEEEEEDEKLER | 3230.20 | 54.34 | 62.63 |
| 277 | Q8NBN3 | WVEENVPSVTDVALPALLDs*DEER    | 2850.30 | 71.99 | 45.19 |
| 278 | Q8NE71 | KAEQGs*EEEGEGEEEEEGGESK      | 2561.95 | 24.40 | 58.01 |
|     |        | KLSVPt*s*DEEDEVPAKPR         | 2254.00 | 39.23 | 41.04 |
|     |        | KLs*VPt*s*DEEDEVPAKPR        | 2333.97 | 42.36 | 50.25 |
|     |        | KLs*VPt*SDEEDEVPAKPR         | 2254.00 | 39.34 | 34.37 |
|     |        | KLSVPt*SDEEDEVPAKPR          | 2174.04 | 36.14 | 26.17 |
|     |        | Ls*VPTs*DEEDEVPAKPR          | 2125.92 | 43.45 | 24.71 |
|     |        | LSVPt*s*DEEDEVPAKPR          | 2125.91 | 43.71 | 84.09 |
|     |        | LSVPTs*DEEDEVPAKPR           | 2045.94 | 39.58 | 39.03 |
| 279 | Q8NEY8 | DNTFFRES*PVGR                | 1504.66 | 42.27 | 24.57 |
|     |        | DTs*PSSGSAVSSSK              | 1376.56 | 20.73 | 32.86 |
| 280 | Q8NI08 | VLs*STs*EEDEPGVVK            | 1735.71 | 46.76 | 23.81 |
| 281 | Q8TAQ2 | KRs*Ps*PSPTPEAK              | 1541.68 | 19.49 | 28.87 |
| 282 | Q8TCJ2 | ENPPVEDs*s*DEDDKR            | 1891.66 | 25.06 | 68.13 |
|     |        | ENPPVEDs*SDEDDKR             | 1811.70 | 22.93 | 45.73 |
|     |        | ENPPVEDs*s*DEDDKRNQGNLYDK    | 2824.09 | 31.99 | 24.21 |
| 283 | Q8TDD1 | IDDRDs*DEEGASDR              | 1659.62 | 21.24 | 40.28 |
| 284 | Q8TEA8 | SAs*SGAEGDVSSSEREP           | 1644.63 | 29.98 | 25.29 |
| 285 | Q8WVC0 | KYVIs*DEEEEDDD               | 1665.61 | 40.06 | 36.94 |
| 286 | Q8WW12 | TLs*VAAAFNEDEDESEPEEMPEAK    | 2686.11 | 57.64 | 26.61 |

|     |        |                                      |         |       |       |
|-----|--------|--------------------------------------|---------|-------|-------|
|     |        | TLSVAAAFNEDEDs*EPEEMPPEAK            | 2686.11 | 57.23 | 38.62 |
| 287 | Q8WWI1 | SHs*PSASQSGSQLR                      | 1508.64 | 21.40 | 53.15 |
|     |        | VTt*EIQLPSQSPVVEEQSPASLSSLR          | 2763.35 | 57.45 | 32.71 |
| 288 | Q8WWM7 | LQPSs*SPENSLDPFPPR                   | 1947.88 | 53.60 | 60.70 |
|     |        | STSTPTs*PGPR                         | 1167.50 | 21.31 | 43.54 |
| 289 | Q8WWQ0 | KVLs*D*s*EDEEKDADVPGTSTR             | 2438.00 | 34.60 | 38.88 |
|     |        | VLs*D*s*EDEEKDADVPGTSTR              | 2309.89 | 40.11 | 50.35 |
| 290 | Q8WWY3 | Ss*Gt*ASSVAFTPLQGLEIVNPQAAEKK        | 2890.36 | 66.34 | 23.37 |
| 291 | Q8WX93 | IAS*DEEIQGTK                         | 1270.55 | 30.26 | 67.58 |
|     |        | IAS*DEEIQTKDAVIQDLR                  | 2310.09 | 56.96 | 64.92 |
|     |        | s*R*s*RDs*GDENEPIQR                  | 2114.75 | 27.92 | 45.70 |
| 292 | Q92466 | SRs*PLELEPEAK                        | 1435.68 | 34.04 | 36.24 |
| 293 | Q92504 | EKQs*s*EEEEKETR                      | 1768.66 | 18.79 | 73.88 |
| 294 | Q92522 | AGGSAALs*PSK                         | 1025.47 | 21.73 | 35.84 |
| 295 | Q92538 | ADAPDAGAQs*DSELPSYHQNDVSLDR          | 2838.19 | 43.98 | 33.13 |
| 296 | Q92576 | MAPPVDDLs*PK                         | 1249.55 | 40.53 | 39.88 |
| 297 | Q92597 | SRT*As*GSSVTSLDGTR                   | 1741.71 | 33.27 | 22.05 |
|     |        | t*ASGSSVTSLDGTR                      | 1418.62 | 33.69 | 45.93 |
|     |        | TAs*GSSVTSLDGTR                      | 1418.62 | 33.75 | 61.58 |
| 298 | Q92598 | IEs*PKLER                            | 1051.52 | 25.89 | 76.48 |
| 299 | Q92685 | SGs*AAQAEGLeK                        | 1258.51 | 27.07 | 40.45 |
| 300 | Q92688 | KREt*DDEGEDD                         | 1388.48 | 18.09 | 70.61 |
| 301 | Q92769 | IACDEEFs*D*s*EDEGEGGRR               | 2317.81 | 35.66 | 28.39 |
|     |        | MLPHAPGVQMAIPEDAVHEDs*GDEDGEDPDKR    | 3665.54 | 44.64 | 24.90 |
| 302 | Q92882 | t*LSNAEDYLDDEDs*D                    | 1861.59 | 79.00 | 21.33 |
| 303 | Q92922 | KHs*Ps*PPPTPTESR                     | 1774.76 | 22.49 | 44.91 |
|     |        | KHs*Ps*PPPt*PTESR                    | 1854.72 | 22.71 | 24.05 |
| 304 | Q92945 | VQIs*PDSGGLPER                       | 1434.66 | 39.77 | 25.16 |
| 305 | Q969G5 | APEPLGPADQSELGPEQLEAEVGEs*s*DEEPVESR | 3737.55 | 67.80 | 84.86 |
| 306 | Q96B23 | RDs*s*ESQLASTESDKPTTGR               | 2311.95 | 28.55 | 24.62 |
| 307 | Q96C57 | EKEEs*PQPR                           | 1179.50 | 17.83 | 36.26 |
| 308 | Q96D46 | DSAIPVESDt*DDEGAPR                   | 1853.75 | 39.72 | 36.24 |
|     |        | DSAIPVEs*DtDDEGAPR                   | 1933.71 | 45.95 | 85.36 |
| 309 | Q96E09 | RIDFIPVs*PAPs*PTR                    | 1812.85 | 55.79 | 50.22 |
| 310 | Q96G23 | LVEDERs*DREEt*Es*s*EGEEAAAGGGAK      | 3128.11 | 34.53 | 51.74 |
| 311 | Q96GM8 | AADs*DDGAVSAPAASDGGVSK               | 1927.79 | 31.82 | 29.68 |
| 312 | Q96I25 | RPDPDs*DEDEDYER                      | 1817.66 | 27.49 | 24.31 |
|     |        | RPDPDs*DEDEDYERER                    | 2102.79 | 27.02 | 31.18 |
| 313 | Q96JC9 | t*s*PLKDNPSPEQLDDIKR                 | 2310.04 | 39.11 | 39.59 |
| 314 | Q96JM3 | AVPPVs*PELR                          | 1144.57 | 38.25 | 49.64 |
|     |        | GQEs*s*SDQEQVDVESIDFSKENK            | 2745.08 | 50.37 | 14.08 |
|     |        | KPGPPLs*PEIR                         | 1270.66 | 33.95 | 47.96 |
|     |        | KPGPPLs*PEIRs*PAGs*PELR              | 2325.04 | 45.04 | 30.80 |
| 315 | Q96K21 | LPDs*DDDEDEETAIQR                    | 1927.76 | 39.50 | 40.79 |

|     |        |                                     |         |       |       |
|-----|--------|-------------------------------------|---------|-------|-------|
| 316 | Q96MU7 | AKs*Pt*PDGSER                       | 1304.49 | 18.57 | 37.28 |
|     |        | RAKs*Pt*PDGSER                      | 1460.59 | 17.82 | 26.74 |
| 317 | Q96N20 | RSs*LLR                             | 811.42  | 27.58 | 29.78 |
| 318 | Q96PK6 | QPt*PPFFGR                          | 1126.51 | 50.38 | 41.44 |
|     |        | TRLs*PPR                            | 906.46  | 25.43 | 27.08 |
| 319 | Q96QR8 | DSLGFIEHYAQLGPs*SPEQLAAGAEEGGPR     | 3335.48 | 73.80 | 35.10 |
|     |        | Ds*LGDFIEHYAQLGPSSPEQLAAGAEEGGPR    | 3335.48 | 73.36 | 28.63 |
| 320 | Q96S82 | DMPGGFLFEGLS*DDEDDFHPNTR            | 2691.07 | 70.98 | 28.02 |
| 321 | Q96ST2 | AAVLS*Ds*EDEEKASAK                  | 1809.71 | 30.73 | 33.35 |
|     |        | AAVLS*Ds*EDEEKASAKK                 | 1937.81 | 26.41 | 23.03 |
|     |        | EAEDs*Ds*DDNIKR                     | 1653.57 | 22.83 | 97.79 |
|     |        | HQAs*Ds*ENEPPKPR                    | 1880.72 | 20.92 | 17.42 |
|     |        | Is*Ds*Es*EDPPRHQAs*DSENEELPKPR      | 3269.21 | 36.53 | 20.86 |
|     |        | KAAVLS*Ds*EDEEKASAK                 | 1937.81 | 26.87 | 10.63 |
|     |        | TIAs*Ds*EEEAGKELSDK                 | 1968.78 | 37.63 | 67.45 |
|     |        | t*IAS*DSEEEAGKELSDKK                | 2096.86 | 32.36 | 15.56 |
|     |        | TIAs*Ds*EEEAGKELSDKK                | 2096.87 | 32.29 | 15.92 |
| 322 | Q96T23 | GRs*t*DEYs*EADEEEEEEGKPSR           | 2897.98 | 36.03 | 27.70 |
| 323 | Q96T37 | DRT*PPLLYR                          | 1210.60 | 40.14 | 29.08 |
|     |        | HcAPs*PDRs*PELSSSR                  | 1942.75 | 26.34 | 13.23 |
|     |        | SLs*PGGAALGYR                       | 1228.57 | 43.18 | 70.66 |
| 324 | Q96TA1 | AAPEASs*PPAs*PLQHLLPGK              | 2127.99 | 55.53 | 32.13 |
|     |        | QVVs*VVQDEEVGLPFEASPESPPAs*PDGVTEIR | 3721.70 | 75.30 | 43.83 |
| 325 | Q99426 | LGEy*EDVSR                          | 1147.47 | 30.30 | 46.05 |
| 326 | Q99590 | KRPQs*Ps*PR                         | 1212.53 | 17.85 | 24.50 |
| 327 | Q99613 | QPLLLs*EDEEDTKR                     | 1752.81 | 39.13 | 98.67 |
| 328 | Q99733 | EFIt*GDVEPTDAESEWSENEEEKLAGDMK      | 3631.49 | 56.19 | 19.93 |
| 329 | Q99961 | IAASSs*FR                           | 918.41  | 29.02 | 47.37 |
| 330 | Q9BPX3 | TLHcEGTEINs*DDEQESKEVEETATAK        | 3130.31 | 38.50 | 42.03 |
| 331 | Q9BQA1 | KEt*PPPLVPPAAR                      | 1452.76 | 35.86 | 37.60 |
| 332 | Q9BQE3 | t*IGGGDDSFNTFFSETGAGK               | 2087.85 | 63.19 | 82.79 |
|     |        | TIGGGDDs*FNTFFSETGAGK               | 2087.86 | 63.72 | 62.21 |
| 333 | Q9BQG0 | ALGGEDs*ENEEELGDEAMMALDQSLASLFAEQK  | 3607.53 | 84.60 | 38.46 |
| 334 | Q9BRJ6 | ELDEEGs*DPPLPGR                     | 1590.67 | 40.98 | 36.42 |
| 335 | Q9BTC0 | QEAIPLDEs*PPVs*DSEEQQESAR           | 2816.12 | 55.84 | 80.72 |
| 336 | Q9BTU6 | VAAAAGSGPs*PPGs*PGHDRER             | 2132.90 | 25.06 | 30.67 |
|     |        | VAAAAGs*GPSPPGs*PGHDRER             | 2132.89 | 24.74 | 31.02 |
| 337 | Q9BUA3 | AEs*PSPAPPPGLR                      | 1355.64 | 35.27 | 26.18 |
| 338 | Q9BUQ8 | DRDAs*PSKEER                        | 1369.57 | 17.90 | 26.87 |
| 339 | Q9BUR4 | EGDPVSLSTPLETEFGs*Ps*ELSPR          | 2691.13 | 74.71 | 27.27 |
|     |        | VFPEPt*ESGDEGEELGLPLLSTR            | 2552.18 | 72.82 | 33.39 |
| 340 | Q9BVV8 | YGLLANt*EDPTMASLDS*DEETVFESR        | 3179.26 | 80.63 | 86.47 |
| 341 | Q9BW71 | AVEEs*s*DEERQR                      | 1594.58 | 20.50 | 40.81 |
|     |        | KQAREEs*EEs*EAEPVQR                 | 2161.88 | 24.11 | 31.72 |

|     |        |                                 |         |       |        |
|-----|--------|---------------------------------|---------|-------|--------|
|     |        | RLs*Gs*s*EDEEDSGKGEPTAK         | 2318.84 | 24.90 | 26.58  |
|     |        | RPpt*Pcs*DPER                   | 1471.54 | 23.60 | 23.81  |
|     |        | s*LKESEQEs*EEEILAQKK            | 2264.99 | 35.08 | 33.56  |
|     |        | SLKEs*EQEs*EEEILAQKK            | 2264.99 | 35.50 | 30.89  |
| 342 | Q9BWH2 | s*NQIPTEVR                      | 1123.51 | 33.70 | 39.56  |
| 343 | Q9BZZ5 | ASEDTTSGs*PPKK                  | 1384.60 | 18.24 | 61.05  |
| 344 | Q9C0C2 | ASRVPs*s*DEEVVEEPQSR            | 2160.89 | 37.15 | 54.52  |
|     |        | LDs*PPPs*PITEASEAAEAAEAGNLAVSSR | 2997.32 | 77.63 | 64.56  |
|     |        | s*QEADVQDWEFR                   | 1589.63 | 54.94 | 58.91  |
|     |        | TEAQDLcRAs*PEPPGPESSSR          | 2351.00 | 32.76 | 15.56  |
|     |        | VPs*s*DEEVVEEPQSR               | 1846.72 | 42.62 | 30.24  |
| 345 | Q9GZY8 | ERs*MSENAVR                     | 1258.52 | 22.88 | 26.78  |
| 346 | Q9H019 | NAs*VPNLR                       | 950.44  | 33.35 | 32.48  |
| 347 | Q9H0D6 | AEDs*Ds*EPEPEDNVR               | 1848.62 | 34.96 | 19.65  |
|     |        | KAEDs*Ds*EPEPEDNVR              | 1976.72 | 28.97 | 95.17  |
| 348 | Q9H1B7 | RNs*s*SPVs*PASVPGQR             | 1865.74 | 34.51 | 24.62  |
| 349 | Q9H1E3 | ATVt*Ps*PVKGK                   | 1244.57 | 23.62 | 46.75  |
|     |        | ATVTPs*PVKGK                    | 1164.60 | 21.42 | 35.22  |
|     |        | DDs*Hs*AEDSEDEKEDHK             | 2132.70 | 18.09 | 10.64  |
|     |        | DDSHs*AEDs*EDEKEDHK             | 2132.70 | 18.17 | 12.74  |
|     |        | DDs*Hs*AEDs*EDEKEDHKNVR         | 2581.87 | 19.34 | 10.89  |
|     |        | DDSHs*AEDs*EDEKEDHKNVR          | 2501.91 | 19.81 | 51.43  |
|     |        | EEDEEPEs*PPEKK                  | 1622.65 | 21.68 | 20.17  |
|     |        | KDDs*Hs*AEDSEDEKEDHK            | 2260.80 | 17.70 | 12.02  |
|     |        | KDDs*Hs*AEDs*EDEKEDHK           | 2340.75 | 17.89 | 48.21  |
|     |        | KDDs*HSAEDs*EDEKEDHK            | 2260.79 | 17.83 | 14.15  |
|     |        | KVVDYSQFQEs*DDADEDYGR           | 2445.97 | 43.40 | 129.86 |
|     |        | KVVDYSQFQEs*DDADEDYGRDSGPPTK    | 3128.30 | 40.19 | 71.00  |
|     |        | LKATVt*Ps*PVKGK                 | 1485.75 | 26.30 | 34.86  |
|     |        | NSQEDs*EDs*EDKDVK               | 1884.64 | 21.36 | 78.99  |
|     |        | NSQEDs*EDSEDKDVK                | 1804.68 | 19.41 | 57.17  |
|     |        | SGKNSQEDs*EDs*EDKDVK            | 2156.79 | 19.24 | 83.54  |
|     |        | TPSPKEEDEEPEs*PPEKK             | 2132.93 | 22.48 | 33.29  |
|     |        | VVDYSQFQEs*DDADEDYGR            | 2317.88 | 48.82 | 90.42  |
|     |        | VVDYSQFQEs*DDADEDYGRDSGPPTK     | 3000.20 | 43.83 | 65.03  |
|     |        | VVDYSQFQEs*DDADEDYGRDSGPPTTK    | 3128.32 | 39.26 | 27.75  |
| 350 | Q9H307 | GFs*DSGGGPPAK                   | 1156.47 | 28.46 | 76.76  |
|     |        | RGFs*DSGGGPPAK                  | 1312.57 | 24.89 | 32.88  |
| 351 | Q9H3N1 | KVEEQEAEEDVs*EEEEASK            | 2517.99 | 31.45 | 95.30  |
| 352 | Q9H4A3 | DVDDGs*GSPHs*PHQLSSK            | 2009.76 | 24.27 | 42.79  |
|     |        | DVDDGs*Gs*PHSPHQLSSK            | 2009.76 | 24.94 | 27.93  |
|     |        | DVDDGs*Gs*PHs*PHQLSSK           | 2089.73 | 27.33 | 13.20  |
|     |        | s*GSGGSAKEPQEER                 | 1555.64 | 18.57 | 35.17  |
|     |        | SGs*GGGSAKEPQEER                | 1555.64 | 18.70 | 49.08  |

|     |        |                                         |         |       |        |
|-----|--------|-----------------------------------------|---------|-------|--------|
| 353 | Q9H4L7 | KLs*SSs*EPy*EEDEFNDDQSIKK               | 2815.06 | 45.71 | 25.77  |
|     |        | t*FNKDTVIIIVSEPs*EDEESQGLPTMAR          | 3153.38 | 58.48 | 24.56  |
| 354 | Q9H501 | ALAEeAs*EEELPs*DVDLNDPYFAEEVK           | 3169.32 | 73.60 | 21.22  |
| 355 | Q9H6F5 | ALVEFESNPEEt*REPGSPPSVQR                | 2635.20 | 44.89 | 40.29  |
|     |        | ALVEFESNPEETREPGs*PPSVQR                | 2635.20 | 45.12 | 56.67  |
|     |        | LGGLRPEs*PESLTSVSR                      | 1864.92 | 43.46 | 46.37  |
|     |        | LQQGAGLEs*PQQQPEPGAA*s*PQR              | 2463.07 | 40.11 | 21.18  |
|     |        | LQQGAGLESPQQQPEPGAA*s*PQR               | 2383.10 | 36.42 | 28.93  |
| 356 | Q9H6H4 | SFs*MQDLR                               | 1063.43 | 47.84 | 33.81  |
| 357 | Q9H6Z4 | SAGGs*s*PEGGEs*DREDGNYcPPVKR            | 2963.06 | 33.57 | 40.18  |
| 358 | Q9H788 | TLs*SSAQEDIIR                           | 1399.65 | 43.52 | 82.60  |
| 359 | Q9H7N4 | FDIYDPFHPT*DEAYSPPPAPEQK                | 2741.17 | 61.67 | 22.55  |
|     |        | FDIYDPFHPTDEAYs*PPPAPEQK                | 2741.17 | 62.72 | 30.49  |
|     |        | GTLDEEDEEADs*DTDDIDHR                   | 2356.86 | 36.58 | 72.76  |
| 360 | Q9NP74 | AEEs*IEDIYANIPDLPK                      | 1996.92 | 63.07 | 21.76  |
| 361 | Q9NQ55 | LQDIs*ELLATGAGLSEs*EAEPDGDHNITELPQAVAGR | 3963.79 | 73.84 | 25.70  |
|     |        | VGGs*DEEASGIPSR                         | 1440.60 | 32.15 | 105.94 |
| 362 | Q9NQZ2 | TSAAAcAVTDLs*DDs*DFDEKAK                | 2476.95 | 45.90 | 32.29  |
| 363 | Q9NR30 | KKEEPSQNDIs*PK                          | 1579.74 | 22.46 | 62.05  |
|     |        | NEEPs*EEEIDAPKPK                        | 1791.78 | 30.36 | 55.05  |
| 364 | Q9NRY4 | TSFSVGs*DDELGPIR                        | 1659.73 | 55.00 | 38.40  |
| 365 | Q9NTI5 | AEs*PESSAIESTQSTPQK                     | 1956.84 | 33.52 | 65.62  |
|     |        | GRPSKt*Ps*PSQPK                         | 1526.68 | 18.49 | 16.12  |
| 366 | Q9NTJ3 | RREEGPPPPSPDGASs*DAEPEPPSGR             | 2751.21 | 30.94 | 33.89  |
|     |        | RREEGPPPPs*PDGASs*DAEPEPPSGR            | 2831.17 | 32.58 | 34.79  |
|     |        | RREEGPPPPs*PDGASs*SDAEPEPPSGR           | 2831.18 | 32.51 | 19.39  |
|     |        | t*ESPATAAAETASEELDNR                    | 1971.81 | 51.49 | 112.68 |
| 367 | Q9NVD7 | SPTPKs*PPSR                             | 1133.54 | 20.04 | 33.96  |
| 368 | Q9NVM6 | QAQAQEs*EEEEESR                         | 1729.66 | 21.74 | 37.49  |
| 369 | Q9NWB6 | ASs*PPDRIDIFGR                          | 1510.70 | 48.99 | 33.82  |
| 370 | Q9NWH9 | DGQDAIAQs*PEKESK                        | 1682.73 | 23.66 | 30.21  |
| 371 | Q9NXG2 | FTDKDQQPs*Gs*EGEDDDAEAAALKK             | 2741.09 | 34.76 | 68.41  |
| 372 | Q9NYF8 | ETQs*PEQVKSEK                           | 1469.65 | 19.05 | 37.36  |
|     |        | FNDs*EGDDTEETEDYR                       | 2001.68 | 37.88 | 58.48  |
|     |        | GRAEGEWEDQEALDy*FSDKESGK                | 2726.13 | 49.01 | 20.54  |
|     |        | GRAEGEWEDQEALDYFs*DKESGK                | 2726.13 | 49.54 | 41.36  |
|     |        | IDIs*PSTLR                              | 1081.53 | 45.67 | 67.66  |
|     |        | IDIs*PSTLRK                             | 1209.62 | 36.94 | 26.65  |
|     |        | KAEGEPQEEs*PLKSK                        | 1736.80 | 22.78 | 20.05  |
|     |        | KETQs*PEQVKSEK                          | 1597.75 | 18.17 | 18.98  |
|     |        | LKDLFDYs*PPLHK                          | 1652.81 | 48.94 | 54.93  |
|     |        | NTPSQHSHSIQHs*PER                       | 1921.83 | 20.60 | 23.47  |
|     |        | NTPSQHs*HSIQHs*PER                      | 2001.79 | 18.66 | 23.12  |
|     |        | Nt*PSQHSHSIQHs*PER                      | 2001.80 | 20.09 | 50.22  |



|     |        |                                      |         |       |       |
|-----|--------|--------------------------------------|---------|-------|-------|
|     |        | QKFNDs*EGDDTEETEDYR                  | 2257.83 | 32.51 | 38.37 |
|     |        | RIDIs*PSTLR                          | 1237.63 | 40.25 | 51.06 |
|     |        | STFREEs*PLR                          | 1301.59 | 30.16 | 19.58 |
| 373 | Q9NYV4 | HLLTDLPLPELPGGDLs*PPDs*PEPK          | 2891.36 | 73.41 | 26.39 |
|     |        | s*Ss*PFLSKR                          | 1168.48 | 33.98 | 36.70 |
| 374 | Q9NZ63 | RGDs*Es*EEDEQDSEEVr                  | 2155.73 | 27.71 | 23.80 |
|     |        | RRGDs*Es*EEDEQDSEEVr                 | 2311.83 | 24.80 | 56.40 |
|     |        | VGDt*EKPEPERSPPNR                    | 1887.86 | 21.76 | 22.59 |
|     |        | VGDTEKPEPERS*PPNR                    | 1887.86 | 21.94 | 35.11 |
| 375 | Q9NZI8 | QGs*PVAAGAPAK                        | 1133.53 | 21.76 | 71.81 |
| 376 | Q9NZT2 | KVEEEGs*PGDPDHEASTQGR                | 2204.91 | 22.25 | 23.89 |
| 377 | Q9P035 | RPLFLAPDFDRWLDEs*DAEMELR             | 2901.31 | 72.10 | 29.79 |
|     |        | WLDEs*DAEMELR                        | 1573.62 | 59.53 | 60.97 |
| 378 | Q9P2I0 | EADIDs*s*DEs*DIEEDIDQPSAHK           | 2784.97 | 58.02 | 22.89 |
| 379 | Q9UHB6 | ETPHs*PGVEDAPIAK                     | 1627.73 | 30.62 | 21.88 |
|     |        | SEVQQPVHPKPLs*PDSR                   | 1980.95 | 28.36 | 26.28 |
| 380 | Q9UIG0 | LAEDEGDs*EPEAVGQSR                   | 1868.75 | 32.89 | 35.20 |
| 381 | Q9UJX2 | RVs*PLNLSs*VTP                       | 1429.65 | 57.67 | 20.85 |
| 382 | Q9UK76 | RNs*SEASSGDFLDLK                     | 1705.74 | 45.45 | 64.48 |
| 383 | Q9UKM9 | GRLs*PVPVPR                          | 1157.62 | 33.67 | 29.88 |
|     |        | TRDDGDEEGLLTHs*EEEELEHs*QDTDADDGALQ  | 3687.42 | 49.55 | 39.77 |
|     |        | TRDDGDEEGLLt*Hs*EEEELEHs*QDTDADDGALQ | 3767.38 | 52.89 | 18.25 |
|     |        | TRDDGDEEGLLt*Hs*EEEELEHSQDTDADDGALQ  | 3687.42 | 48.43 | 28.24 |
|     |        | TRDDGDEEGLLt*HSEEELEHSQDTDADDGALQ    | 3607.45 | 46.95 | 30.83 |
| 384 | Q9UKV3 | GVPAGNs*DTEGGQPGR                    | 1578.65 | 24.66 | 79.24 |
|     |        | LQPERGs*PK                           | 1091.52 | 18.79 | 27.99 |
|     |        | RLs*QPESAEK                          | 1224.56 | 21.55 | 41.38 |
|     |        | SKs*Ps*PPRLTEDR                      | 1629.70 | 29.49 | 20.23 |
|     |        | SSSISEEKGDs*DDEKPR                   | 1945.80 | 21.04 | 71.73 |
|     |        | TAQVPs*PPR                           | 1032.49 | 31.06 | 25.20 |
|     |        | TAQVPs*PPRGK                         | 1217.60 | 25.16 | 17.46 |
| 385 | Q9UKY7 | KTPQGPPEIYs*DTQFPSLQSTAK             | 2600.23 | 48.10 | 35.90 |
|     |        | KTPQGPPEIy*SDTQFPSLQSTAK             | 2600.22 | 48.24 | 35.26 |
| 386 | Q9ULW0 | SSDQPLTVPVs*PK                       | 1434.69 | 40.94 | 36.16 |
| 387 | Q9UN86 | YEDEVFGDs*EPELDEEs*EDEVEEEQEER       | 3550.26 | 65.53 | 35.69 |
| 388 | Q9UNE7 | LGAGGGs*PEKSPSAQELK                  | 1792.85 | 29.68 | 31.33 |
| 389 | Q9UNL2 | KLs*EADNR                            | 1012.45 | 18.60 | 30.99 |
| 390 | Q9UNX4 | Gs*SPGIQDTLEAEDGAFETDEAPEDR          | 2816.14 | 59.45 | 41.86 |
| 391 | Q9UPN9 | TFAPLPEFEQEEDDGEVt*EDs*DEDFIQPR      | 3544.40 | 80.12 | 68.36 |
| 392 | Q9UPQ0 | GSSDGRGs*DSESDLPHR                   | 1838.73 | 23.61 | 19.55 |
|     |        | GSSs*DGRGSDSESDLPHR                  | 1838.73 | 23.71 | 22.04 |
|     |        | GSSDGRGs*Ds*ESDLPHR                  | 1918.69 | 25.24 | 12.07 |
|     |        | QTPs*PDVVLR                          | 1191.58 | 40.93 | 56.33 |
|     |        | s*FQGDDSDLLLK                        | 1417.62 | 53.66 | 13.23 |

|     |        |                                |         |       |       |
|-----|--------|--------------------------------|---------|-------|-------|
|     |        | SINHQIEs*PSEr                  | 1476.64 | 26.27 | 47.10 |
|     |        | SRQt*Ps*PDVVLR                 | 1514.67 | 38.55 | 39.77 |
| 393 | Q9UQ35 | ALPQt*PRPR                     | 1115.57 | 24.21 | 22.48 |
|     |        | AQt*PPGSLSGSKs*PcPQEK          | 2212.93 | 32.47 | 43.98 |
|     |        | ARs*Rt*PPSAPSQR                | 1657.72 | 20.52 | 31.22 |
|     |        | ELSNs*PLRENSFGs*PLEFR          | 2339.01 | 60.02 | 36.71 |
|     |        | ELs*NSPLRENSFGs*PLEFR          | 2339.01 | 60.60 | 44.75 |
|     |        | ELSNs*PLRENSFGSPLEFR           | 2259.05 | 55.55 | 20.55 |
|     |        | GEFSAs*PMLK                    | 1146.49 | 46.47 | 47.58 |
|     |        | GQs*QTSPDHRSDt*s*s*PEVR        | 2390.81 | 26.62 | 16.14 |
|     |        | GQs*Qt*SPDHRSDTs*s*s*PEVR      | 2390.80 | 26.38 | 22.93 |
|     |        | GRs*Rt*PPTSR                   | 1274.54 | 18.12 | 19.38 |
|     |        | HAs*s*s*PEs*PKPAPAPGSHR        | 2216.79 | 22.92 | 37.40 |
|     |        | HGGs*PQPLATTPLSQEPVNPPEASPt*R  | 3012.35 | 47.91 | 40.84 |
|     |        | HGGs*PQPLAt*TPLSQEPVNPPEASPt*R | 3092.32 | 50.41 | 13.00 |
|     |        | HRRs*Ps*Vs*s*PEPAEK            | 1983.71 | 22.97 | 16.50 |
|     |        | MALPPQEDATAs*PPRQK             | 1916.88 | 33.87 | 20.11 |
|     |        | MScFSRPs*Ms*PTPLDR             | 2028.78 | 47.62 | 29.55 |
|     |        | NHs*Gs*Rt*PPVALNSSR            | 1919.75 | 31.15 | 32.68 |
|     |        | RGs*Rs*SPEPK                   | 1260.51 | 17.34 | 13.75 |
|     |        | RPs*PQPSPR                     | 1101.52 | 18.78 | 36.21 |
|     |        | Rs*Rs*Vs*PcSNVESR              | 1860.68 | 25.13 | 53.31 |
|     |        | RVSPt*PAPK                     | 1129.58 | 21.75 | 25.97 |
|     |        | RVPs*PTPAPK                    | 1129.58 | 22.11 | 24.79 |
|     |        | SATRP*s*Ps*PER                 | 1344.53 | 20.71 | 20.04 |
|     |        | ScFEs*SPDPELK                  | 1475.57 | 40.08 | 14.79 |
|     |        | ScFEs*PDPELK                   | 1475.58 | 39.70 | 27.88 |
|     |        | SGMs*PEQSR                     | 1058.40 | 21.76 | 34.81 |
|     |        | SGs*s*PEVKDKPR                 | 1446.60 | 18.78 | 58.88 |
|     |        | s*Ls*GSs*PcPK                  | 1259.38 | 32.36 | 50.99 |
|     |        | s*LSYs*PVER                    | 1197.46 | 42.97 | 56.06 |
|     |        | s*Ls*Ys*PVER                   | 1277.42 | 53.37 | 28.73 |
|     |        | s*Lt*Rs*PPAIR                  | 1337.54 | 39.26 | 23.52 |
|     |        | s*Lt*RSPPAIR                   | 1257.57 | 34.45 | 24.10 |
|     |        | s*RA*s*PVSR                    | 1019.41 | 18.81 | 30.26 |
|     |        | s*Rs*PLAIR                     | 1059.47 | 32.35 | 26.35 |
|     |        | s*Rs*PSs*PELNNK                | 1555.56 | 27.02 | 24.40 |
|     |        | s*Rs*Ps*SPELNNK                | 1555.56 | 26.89 | 20.18 |
|     |        | s*Rs*Rt*PLISR                  | 1412.59 | 28.59 | 16.84 |
|     |        | s*Rs*Rt*PPVTR                  | 1396.55 | 21.15 | 21.82 |
|     |        | s*Rt*PLISR                     | 1089.49 | 30.86 | 30.31 |
|     |        | s*Rt*PLLPR                     | 1099.51 | 36.66 | 27.18 |
|     |        | s*Rt*PPAIR                     | 1057.46 | 26.63 | 18.73 |
|     |        | s*Rt*PPSAPSQR                  | 1430.58 | 22.54 | 37.08 |

|     |        |                            |         |       |        |
|-----|--------|----------------------------|---------|-------|--------|
|     |        | SRt*s*PVSR                 | 1049.42 | 18.98 | 31.72  |
|     |        | SRTs*PVSR                  | 969.45  | 18.15 | 31.74  |
|     |        | SRTs*PVTR                  | 983.47  | 18.43 | 34.20  |
|     |        | s*RTSPVTR                  | 983.47  | 18.52 | 18.37  |
|     |        | s*RTs*PVTR                 | 1063.43 | 19.28 | 27.95  |
|     |        | s*SGHSSs*ELSPDAVEK         | 1776.67 | 32.40 | 15.97  |
|     |        | s*SRSs*PELTR               | 1279.51 | 23.46 | 37.57  |
|     |        | Ss*RSs*PELTR               | 1279.51 | 23.17 | 34.82  |
|     |        | s*Vs*PcSNVESR              | 1381.48 | 31.57 | 45.90  |
|     |        | THTt*ALAGRSPs*PASGR        | 1826.79 | 23.30 | 52.91  |
|     |        | THTTALAGRs*Ps*PASGR        | 1826.79 | 23.51 | 37.45  |
|     |        | TKs*Rt*PPR                 | 1102.48 | 17.55 | 16.66  |
|     |        | TPAAAAAmNLAs*PR            | 1437.66 | 33.72 | 54.74  |
|     |        | TPAAAAAMNLAs*PR            | 1421.66 | 41.62 | 103.59 |
|     |        | Ts*PPLLDR                  | 978.47  | 37.36 | 36.56  |
|     |        | TVArt*PLGQR                | 1178.61 | 22.68 | 17.76  |
|     |        | Vs*GRTSPPLLDR              | 1377.69 | 32.53 | 14.12  |
|     |        | VSGRTs*PPLLDR              | 1377.69 | 32.92 | 25.48  |
| 394 | Q9UQN3 | ATIs*DEEIER                | 1242.52 | 35.45 | 24.60  |
| 395 | Q9Y2D5 | DALGDSLQVPVs*PSSTTSSR      | 2083.94 | 51.76 | 25.39  |
|     |        | QVLQSTQs*PR                | 1223.58 | 24.94 | 28.29  |
| 396 | Q9Y2U8 | VLLGFSSDEs*DVEASPR         | 1887.84 | 55.53 | 61.58  |
| 397 | Q9Y2W1 | ASAVSELS*PR                | 1096.50 | 32.10 | 69.09  |
|     |        | ERs*PALK                   | 880.43  | 18.59 | 31.18  |
|     |        | ERs*PALKs*PLQSVVVR         | 1925.96 | 42.05 | 55.77  |
|     |        | GSFs*DTGLGDGK              | 1220.48 | 38.41 | 30.78  |
|     |        | IDIs*PSTFR                 | 1115.51 | 50.08 | 61.04  |
|     |        | NKKs*PEIHR                 | 1188.59 | 21.01 | 55.57  |
|     |        | RIDIs*PSTFR                | 1271.61 | 43.52 | 45.62  |
|     |        | TDs*EKPFRGs*QSPK           | 1723.70 | 22.86 | 18.93  |
|     |        | TDSEKPFRGs*Qs*PK           | 1723.70 | 23.13 | 17.35  |
|     |        | TDSEKPFRGs*Qs*PKR          | 1879.81 | 20.98 | 11.29  |
| 398 | Q9Y2X3 | HIKEEPLs*EEEEcTSTAIAs*PEK  | 2742.16 | 40.00 | 41.03  |
|     |        | HIKEEPLs*EEEEcTSTAIASPEK   | 2662.20 | 38.36 | 15.04  |
|     |        | HIKEEPLs*EEEEcTSTAIAs*PEKK | 2870.26 | 36.17 | 44.92  |
| 399 | Q9Y3T9 | DLFDLNs*s*EEDDTEGFSEr      | 2364.85 | 83.00 | 75.74  |
|     |        | EAARs*PDKPGGSPSASR         | 1749.79 | 19.27 | 18.54  |
|     |        | QFKDLFDLNs*s*EEDDTEGFSEr   | 2768.06 | 70.68 | 70.15  |
| 400 | Q9Y4F1 | LGAPENSGIs*TLER            | 1523.71 | 41.01 | 31.42  |
| 401 | Q9Y4H2 | VAs*PTSGVKR                | 1081.54 | 20.22 | 23.09  |
| 402 | Q9Y4P1 | FFDs*EDEDFEILSL            | 1785.71 | 86.16 | 21.47  |
| 403 | Q9Y580 | SFs*SPENFQR                | 1278.52 | 41.70 | 54.15  |
| 404 | Q9Y5J1 | Kt*s*SDDEs*EEDEDDLQR       | 2350.79 | 51.83 | 30.08  |
|     |        | KTs*SDDEs*EEDEDDLQR        | 2270.82 | 43.36 | 107.83 |

|     |        |                                 |         |       |        |
|-----|--------|---------------------------------|---------|-------|--------|
|     |        | KTSs*DDEs*EEDEDDLQR             | 2270.83 | 43.25 | 120.41 |
|     |        | VQEHEDs*GDs*EVENEAK             | 2061.73 | 28.98 | 64.94  |
| 405 | Q9Y6D5 | GSs*LSGTDDGAQE VVKDILEDVV TSAIK | 2913.39 | 83.38 | 85.67  |
| 406 | Q9Y6E2 | KFVEWLQNAEEEs*Es*EGEEN          | 2542.94 | 69.64 | 36.25  |
| 407 | Q9Y6G9 | DFQEYVEPGEDFPAs*PQRR            | 2347.00 | 51.78 | 28.83  |
|     |        | KPVTVSPTTPTs*PTEGEAS            | 1965.91 | 34.28 | 54.21  |
| 408 | Q9Y6R0 | RQLs*LR                         | 852.44  | 24.77 | 30.08  |

m : oxidation on methionine;      c : carbamidomethyl on cysteine.
